# Supplementary material for: Healthcare to parents of young terrorism survivors: a registry-based study in Norway
Source: PubMed Central journal article supplement — BMJ Open. 2017 Dec 21;7(12):e018358. doi: 10.1136/bmjopen-2017-018358 (PMC5778306; doi:10.1136/bmjopen-2017-018358), 2017-12-21
Supplement: bmjopen-2017-018358.draft_revisions.pdf [file bmjopen-2017-018358.draft_revisions.pdf]

# BMJ Open

BMJ Open is committed to open peer review. As part of this commitment we make the peer review history of every article we publish publicly available.

When an article is published we post the peer reviewers' comments and the authors' responses online. We also post the versions of the paper that were used during peer review. These are the versions that the peer review comments apply to.

The versions of the paper that follow are the versions that were submitted during the peer review process. They are not the versions of record or the final published versions. They should not be cited or distributed as the published version of this manuscript.

BMJ Open is an open access journal and the full, final, typeset and author-corrected version of record of the manuscript is available on our site with no access controls, subscription charges or pay-per-view fees (<http://bmjopen.bmj.com>).

If you have any questions on BMJ Open's open peer review process please email [editorial.bmjopen@bmj.com](mailto:editorial.bmjopen@bmj.com)

# BMJ Open

## Post-disaster Healthcare Needs in the Mothers and Fathers of Survivors - a Registry-Based Study of Healthcare Consumption before and after the Utøya Terrorist Attack

|                                 |                                                                                                                                                                                                                                                                                                                                                                                                                                                                                                                                                                                                                          |
|---------------------------------|--------------------------------------------------------------------------------------------------------------------------------------------------------------------------------------------------------------------------------------------------------------------------------------------------------------------------------------------------------------------------------------------------------------------------------------------------------------------------------------------------------------------------------------------------------------------------------------------------------------------------|
| Journal:                        | <i>BMJ Open</i>                                                                                                                                                                                                                                                                                                                                                                                                                                                                                                                                                                                                          |
| Manuscript ID                   | bmjopen-2017-018358                                                                                                                                                                                                                                                                                                                                                                                                                                                                                                                                                                                                      |
| Article Type:                   | Research                                                                                                                                                                                                                                                                                                                                                                                                                                                                                                                                                                                                                 |
| Date Submitted by the Author:   | 23-Jun-2017                                                                                                                                                                                                                                                                                                                                                                                                                                                                                                                                                                                                              |
| Complete List of Authors:       | Haga, Jon Magnus; Institute of Clinical Medicine, Faculty of Medicine, University of Oslo; Norwegian Centre of Violence and Traumatic Stress Studies<br>Thoresen, Siri; Norwegian Centre of Violence and Traumatic Stress Studies, Stene, Lise; Norwegian Centre of Violence and Traumatic Stress Studies, Wentzel-Larsen, Tore; Norwegian Centre of Violence and Traumatic Stress Studies; Centre for Child and Adolescent Mental Health, Eastern and Southern Norway<br>Dyb, Grete; Norwegian Centre of Violence and Traumatic Stress Studies; Institute of Clinical Medicine, Faculty of Medicine, University of Oslo |
| <b>Primary Subject Heading</b>: | Health services research                                                                                                                                                                                                                                                                                                                                                                                                                                                                                                                                                                                                 |
| Secondary Subject Heading:      | Mental health, General practice / Family practice, Health services research, Public health                                                                                                                                                                                                                                                                                                                                                                                                                                                                                                                               |
| Keywords:                       | Terrorism, Posttraumatic stress disorder (PTSD), PRIMARY CARE, MENTAL HEALTH, Parents, Disaster                                                                                                                                                                                                                                                                                                                                                                                                                                                                                                                          |
|                                 |                                                                                                                                                                                                                                                                                                                                                                                                                                                                                                                                                                                                                          |

SCHOLARONE™  
Manuscripts

1  
2  
3 FULL TITLE

4  
5 **Post-disaster Healthcare Needs in the Mothers and Fathers of Survivors - a Registry-Based Study of**  
6  
7 **Healthcare Consumption before and after the Utøya Terrorist Attack**  
8  
9

10  
11 Jon Magnus Haga, Siri Thoresen, Lise Eilin Stene, Tore Wentzel-Larsen, Grete Dyb.  
12

13  
14  
15 Jon Magnus Haga, MD

16  
17  
18 Norwegian Centre of Violence and Traumatic Stress Studies (NKVTS), Oslo, Norway

19  
20 Institute of Clinical Medicine, Faculty of Medicine, University of Oslo, Oslo, Norway  
21

22  
23  
24 Siri Thoresen, PhD

25  
26  
27 Norwegian Centre of Violence and Traumatic Stress Studies (NKVTS), Oslo, Norway  
28

29  
30  
31 Lise Eilin Stene, MD/PhD

32  
33  
34 Norwegian Centre of Violence and Traumatic Stress Studies (NKVTS), Oslo, Norway  
35

36  
37  
38 Tore Wentzel-Larsen, MSc

39  
40  
41 Norwegian Centre of Violence and Traumatic Stress Studies (NKVTS), Oslo, Norway

42  
43  
44 Centre for Child and Adolescent Mental Health, Eastern and Southern Norway, Oslo, Norway  
45

46  
47  
48 Grete Dyb, MD/PhD

49  
50  
51 Norwegian Centre of Violence and Traumatic Stress Studies (NKVTS), Oslo, Norway

52  
53  
54 Institute of Clinical Medicine, Faculty of Medicine, University of Oslo, Oslo, Norway  
55

56  
57  
58 Correspondence to: Jon Magnus Haga, j.m.haga@medisin.uio.no  
59  
60

1  
2  
3 ABSTRACT

4  
5 **Objectives:** To assess changes in parents' short and long term primary and specialized healthcare  
6  
7 consumption following a terrorist attack that threatened the lives of their children.

8  
9 **Design:** Registry-based study of parent healthcare service consumption, three years before and three  
10  
11 years after a terrorist attack.

12  
13 **Setting:** The aftermath of the Utøya terrorist attack. The regular, publicly-funded, universal  
14  
15 healthcare system in Norway.

16  
17 **Intervention:** Parents learning of terrorist attack on their adolescent children on the Utøya summer  
18  
19 camp.

20  
21 **Participants:** Mothers (n=226) and fathers (n=141) of a total of 263 survivors of the terrorist attack  
22  
23 (54.6% of the n=482 survivors 13-33 years).

24  
25 **Main outcome measures:** Rates of primary and specialized somatic and mental healthcare service  
26  
27 consumption in the early (0 to 6 months) and delayed (6 to 36 months) aftermath of the attack,  
28  
29 predicted from negative binominal hurdle regressions. Pre- and post-disaster rates were compared  
30  
31 (rate ratio, RR) and 95% confidence intervals (CI) were generated through bootstrap replications.  
32  
33 Analyses were performed separately in mothers and fathers, adjusted for age of participant and  
34  
35 offset for the time of non-hospitalization.

36  
37 **Results:** Rates of primary healthcare service consumption were found to increase significantly in both  
38  
39 mothers and fathers in the early aftermath of the attack (mothers RR=1.97, 95% CI 1.76 to 2.23;  
40  
41 fathers RR=1.73, 95% CI 1.36 to 2.29). Both rates remained significantly elevated throughout the  
42  
43 delayed aftermath. In specialized mental healthcare, significant increase in service consumption was  
44  
45 observed (early and delayed) in mothers only (early RR=7.00, 95% CI 3.86 to 19.02; delayed RR=3.20,  
46  
47 95% CI 1.49 to 9.49). In somatic healthcare, no significant change in was found.

48  
49 **Conclusion:** Following disasters, healthcare providers must prepare for increased healthcare needs  
50  
51 not only in survivors, but also their close family members, such as parents. Needs may present  
52  
53 shortly after the disaster and require long term follow-up.  
54  
55  
56  
57  
58  
59  
60

**"STRENGTH AND LIMITATIONS" BOX**

- Objective measure on healthcare consumption pre- and post-disaster in a universal, public, accessible and well-developed healthcare system.
- High numbers of both mother and father participants. Nonetheless, the full size of the parent population remains unknown.
- Only services provided by healthcare professionals were included. Psychosocial support by other professionals was not included.

**KEYWORDS**

Disaster

Terrorism

Indirect exposure

PTSD, Anxiety and Depression

Parents

Health services

Primary Healthcare

Specialized Healthcare

Mental Healthcare

Hurdle regression analyses

***Geolocation information:*** Utøya (60°01'25.0"N 10°14'50.0"E)

### "WHAT THIS PAPER ADDS" BOX

#### Evidence before this study

Life threat to a child may severely traumatize its parents. In recent years, a number of terrorist attacks have particularly targeted children, adolescents and young adults when away from their mothers and fathers. Little is known about the long-term health impacts on parents, let alone the long-term healthcare needs that may ensue. We searched PubMed for all indexed publications with the following terms: ("PTSD" OR "traumatization" OR "mental health") AND ("terrorism" OR "disaster") AND ("parents" OR "caregivers"). Final search: May-12-2017, 136 studies identified. A majority of the studies assessed the shared trauma of parent and child or the impact of parental traumas on offspring. Three studies specifically addressed the impact on parents of indirect exposure to a disaster or a terrorist attack affecting offspring, of which two were our previous studies of the Utøya parent population.

#### Added value of this study

Evidence on post-disaster healthcare needs is essential in preparing appropriate post-disaster healthcare responses. Employing an objective measure, this study makes a detailed assessment of primary and specialized healthcare consumption in parents following a terrorist attack on offspring. The study compares rates of healthcare service consumption and numbers of individuals provided for before and after the attack.

#### Implications of all the available evidence

Experiencing life threat to offspring may induce high levels of post-disaster distress in parents. Healthcare needs in parents may present immediately following a disaster and require long-term commitment from both primary and specialized healthcare providers. Primary healthcare may play a particularly important role in supporting parents in crisis.

1  
2  
3 INTRODUCTION  
4

5 Life threat to a child may jeopardize long-term health in its parents. DSM-5 (1) currently recognizes  
6 that learning of a close family member being threatened with death or serious injury as potentially  
7 severely traumatizing. In recent years, numerous terrorist attacks particularly targeting children,  
8 adolescents and young adults when away from their parents, at school or during their leisure time  
9 (e.g. summer camp, night club, café, concert hall (2-7)). Concerns have been raised about post-  
10 disaster health of survivors. Parental reactions, coping and needs post-disaster have received little  
11 attention.  
12  
13  
14  
15  
16  
17  
18  
19

20 Impact of threat to a child on parental health has previously been addressed in studies of  
21 seriously ill children. Elevated levels of parents' anxiety, depression and post-traumatic stress  
22 reactions have been reported following acute diseases (8, 9) and chronic conditions (10, 11) and  
23 traffic accidents of child (12, 13). Similarly, in parents of sexually abused children (14, 15) and in  
24 parents of young soldiers deployed to hostile environments (16, 17), high levels of emotional distress  
25 may persist for years. Although several population-based studies have previously addressed  
26 individuals physically distant from the site of a terrorist attack (18-23), only one study has specifically  
27 addressed parents who experienced a terrorist attack on their offspring from afar (2). This small very  
28 study (n=20 mothers) reported parental distress at levels comparable to the young survivors  
29 themselves.  
30  
31  
32  
33  
34  
35  
36  
37  
38  
39  
40

41 Post-disaster, healthcare resources may be scarce. Thus, healthcare services need to prepare  
42 for meeting the demand: How many individuals will turn to the healthcare services post-disaster, and  
43 at what time? What services will be needed, and for how long? Insight into long term healthcare  
44 needs in survivors is currently emerging (24-26), but, to date, evidence on parental needs is lacking.  
45  
46  
47  
48  
49

50 In our previous studies of Utøya, we have reported substantial levels of lasting emotional  
51 distress in the parent of the survivors (27, 28). In the present study, we assess parental healthcare  
52 consumption in the three years before and three years after the terrorist attack. Norway has  
53  
54  
55  
56  
57  
58  
59  
60

1  
2  
3 complete population registries on primary and specialized healthcare service utilization from which  
4  
5 data was collected.

6  
7 The first aim of this study was to map out parental pre- and post-disaster healthcare service  
8  
9 consumption. Two questions were posed: did rates of primary and specialized healthcare service  
10  
11 consumption increase post-disaster compared to pre-disaster levels? And, did the proportion of  
12  
13 parents provided for by each of the services increase post-disaster compared to pre-disaster levels?  
14  
15 Assuming time-dependent variation in healthcare consumption, we chose to assess the early  
16  
17 aftermath (first six months) and the delayed aftermath (six months to three years) separately. The  
18  
19 second aim of this study was to assess the reasons for the parents accessing primary healthcare, the  
20  
21 entry-point to the healthcare services in Norway, in the aftermath of the terrorist attack, as recorded  
22  
23 by their medical practitioners.  
24  
25  
26  
27  
28

## 29 METHOD

### 30 Setting

31  
32 The setting of this study is the aftermath of the Utøya terrorist attack.

33  
34  
35 *Trauma:* On July-22-2011, two terrorist attacks shook Norway. A single perpetrator  
36  
37 detonated a bomb in the governmental quarter in Oslo, before setting out on a shooting spree at the  
38  
39 youth summer camp on Utøya Island less than two hours later. The youth were trapped on the small  
40  
41 island with the perpetrator for more than one hour. The attack left 69 dead and 495 alive, of whom  
42  
43 35 had sustained severe physical injuries (29). As the attack unfolded, the parents, all physically  
44  
45 distant from the island, watched events unfold via live media reports and some had access to  
46  
47 intermittent telecommunication with their offspring on the island. Following the attack, the survivors  
48  
49 were reunited with their families throughout the country.  
50  
51

52  
53 *Post-trauma care:* Following the terrorist attack, multi-disciplinary crisis teams established in  
54  
55 affected municipalities (n=128), providing immediate psycho-social support to those in need.

56  
57 Moreover, dedicated contact persons proactively monitored and supported a majority of the families,  
58  
59  
60



1  
2  
3 throughout the first year post-disaster, and facilitated access to the regular healthcare services as  
4  
5 required (27, 30). Post-disaster healthcare services were provided by the regular two-leveled  
6  
7 healthcare system in Norway (31). Level one is the primary healthcare services of general  
8  
9 practitioners (GPs), including emergency primary healthcare. Primary healthcare is the largest  
10  
11 provider of both somatic and mental healthcare services and act as the entry-point and gatekeeper  
12  
13 to secondary healthcare. Level two, the secondary healthcare services, provide specialized mental  
14  
15 and somatic care. Specialized healthcare services are accessed through medical referrals only.  
16  
17 Regular healthcare services are available 24/7, accessible throughout the country and publicly  
18  
19 funded.  
20  
21  
22  
23

#### 24 Design

25  
26 This is a longitudinal, prospective study, assessing registry-based data on parental healthcare  
27  
28 consumption in the periods three years before and after the terrorist attack (2008-July-22 to 2014-  
29  
30 July-21).  
31  
32  
33  
34

#### 35 Procedure

36  
37 Parental recruitment and participation in the earlier waves of the larger Utøya study have previously  
38  
39 been accounted for (27, 32). The third wave of the study, on which this paper reports, had a closed  
40  
41 cohort design, meaning that only participants who had participated in either of the previous waves  
42  
43 were invited (n=532). Invitations were distributed by mail and included information on how to opt  
44  
45 out. By mid-July-2014, three years after the attack, 95% of participants had consented to  
46  
47 participation in writing. The Regional Committees for Medical and Health Research Ethics in Norway  
48  
49 approved the study.  
50  
51  
52  
53

#### 54 Sample

1  
2  
3 Participants in this study were the parents of young survivors of the Utøya terrorist attack (n=482).  
4  
5 The full parental cohort, participants of either of the previous two waves, has previously been  
6  
7 accounted for (27, 32). Participants in the third wave, on which this paper reports, included a total of  
8  
9 226 mothers and 141 fathers (251 distinct families) of 263 survivors aged 13 to 33 years (54.6%).  
10  
11 Mean ages, at the time of the attack, of mothers and fathers were 46.7 (SD 5.8) and 49.7 (SD 5.9)  
12  
13 years, respectively. A majority of the parents were of Norwegian origin (n=335, 92.0%, missing n=3),  
14  
15 held a university or a university college degree (n=225, 61.3%), had an average or above average  
16  
17 financial situation (n=297, 80.9%), and were, at the time of data collection, mostly employed (n=314,  
18  
19 86.3%, missing n=3). Attrition from previous waves (n=165, 31.0%) favored male gender (OR 2.02,  
20  
21  $\chi^2 p < 0.001$ ). Neither non-Norwegian origin (OR-mothers=1.00,  $\chi^2 p = 0.996$ , OR-fathers=1.15,  $\chi^2 p = 0.805$ )  
22  
23 nor levels of early post-traumatic stress reactions (mean-mothers 1.34 vs 1.34, t-test p=0.967, mean-  
24  
25 fathers 0.80 vs 0.88, t-test p=0.358) were associated with non-participation at wave three. Most  
26  
27 participants consented to collection of registry-based data (mothers n=222, 98.5% and fathers n=136,  
28  
29 96.5%).  
30  
31  
32  
33  
34

### 35 Measures

36  
37 *Primary healthcare consumption* was assessed through the Health Economics Administration (HELFO)  
38  
39 database by analyzing the reimbursement claims filed by primary healthcare providers, GPs, to the  
40  
41 national insurance scheme. All records dating from 2008-July-22 to 2014-July-21 were included,  
42  
43 regardless of whether they referred to services provided at a GP clinic, through house calls, by  
44  
45 telephone or mail, provided by regular GPs or locum GPs, within regular office hours or when on-call.  
46  
47 A total of 13,419 records were identified, of which 42 (0.3%) were duplicates (matching date, time,  
48  
49 diagnosis, provider and mode of contact). The non-duplicates (n=13,377) were subdivided according  
50  
51 to the type and time of service (Supplementary table 1). Reason for encountering was recorded  
52  
53 according to International Classification of Primary Care (ICPC-2) (33) and clustered according to type  
54  
55 of health problem (34).  
56  
57  
58  
59  
60

1  
2  
3                    *Specialized healthcare consumption* was assessed through the Norwegian Patient Registry  
4 (NPR) - activity reported by hospitals and hospital clinics - and the Health Economics Administration  
5 Database (HELFO) - reimbursement claims filed to the National Insurance Scheme by private  
6 specialized healthcare providers. All services recorded by physicians and psychologists dating from  
7 2008-July-22 to 2014-July-21 were included, irrespective of whether the service was provided in a  
8 public hospital, a private clinic, by telephone or mail and within regular office hours or not. A total of  
9 6,024 specialized healthcare services were identified (HELFO database n=1,872, NPR n=4,152  
10 services), of which 193 (3.2%) were duplicates (matching date, diagnosis, healthcare provider and  
11 nature of service). The services were subdivided into mental healthcare (n=2,079) and somatic  
12 healthcare (n=3,752) and further into type and time of service (Supplementary table 1).  
13  
14

15                    *Quality of data.* Claims to the national insurance scheme are submitted electronically. All  
16 incomplete claims are automatically rejected and returned to healthcare provider for resubmission.  
17 Thus, the HELFO database contains no missing data. In contrast, NPR does not reject incomplete  
18 information, and consequently contains a small number of incomplete entries (Supplementary table  
19 2).  
20  
21

### 22 Statistics

23  
24  
25  
26  
27  
28  
29  
30  
31  
32  
33  
34  
35  
36  
37  
38  
39  
40  
41  
42  
43  
44  
45  
46  
47  
48  
49  
50  
51  
52  
53  
54  
55  
56  
57  
58  
59  
60

Healthcare service consumption was analyzed through negative binomial hurdle regression models (35). Mothers and fathers were analyzed separately. All regression models were adjusted for age of participant and offset for duration of observational period. As hospital admissions exclude acquisition of further healthcare services, observational periods were defined as days of non-hospitalization. Predictions of frequency of healthcare consumption were made for each period of interest, i.e. pre-disaster, and early- and delayed aftermath. Index parent for the predictions was defined as mother or father of 47 years of age at time of attack. Annualized rates were estimated by dividing predicted frequency of service consumption by duration of the time period assessed (early aftermath=6months, delayed aftermath=30months). Predictions of pre- and post-disaster healthcare

1  
2  
3 consumption were then compared by rate ratios (RR). Bias-corrected and accelerated 95%  
4  
5 confidence intervals (CI) of RR were generated through bootstraps of 10,000 bootstrap replications.  
6

7 Secondly, proportion of mothers and fathers acquiring one or more services in each six  
8  
9 months period was assessed by averaging observed semiannual values before the attack and in the  
10  
11 early and delayed aftermath. Pre- and post-disaster estimates were compared by ratios. Bias-  
12  
13 corrected and accelerated 95% confidence intervals for the ratios were generated through  
14  
15 bootstraps of 10,000 bootstrap replications.  
16

17  
18 All analyses were made on the full dataset, which included all services provided by the  
19  
20 primary and specialized healthcare service providers. However, as supplementary material, the  
21  
22 analyses were repeated on a dataset including only *in person* consultations with the healthcare  
23  
24 provider (i.e. excluding telephone consultations, mail correspondence etc.).  
25

26  
27 Improved quality of the NPR registry during the pre-disaster period was observed. Thus,  
28  
29 sensitivity analyses were performed, repeating all analyses that included pre-disaster NPR data with  
30  
31 values of the final year pre-disaster only.  
32

33 Analyses were performed with R-version-3.0.3 (R Foundation for Statistical Computing), with  
34  
35 the R-packages *pscl* for hurdle regressions and *boot* for bootstrap analyses. Violin plots were  
36  
37 generated through an adaptation of the *vioplot* package.  
38  
39

## 40 41 RESULTS

42  
43 The primary aim of this study was to create a detailed description of pre- and post-disaster patterns  
44  
45 of parental healthcare consumption. Thus, we began by mapping out the frequency distributions by  
46  
47 which each parent accessed healthcare services in the periods three years before and after the attack  
48  
49 (Figure 1a-b). In primary healthcare (red violins), nearly all parents had accessed services on one or  
50  
51 more occasion both pre- and post-disaster. In the aftermath of the attack, there was an increase in  
52  
53 the median number of services used by each patient. In specialized healthcare, the number of  
54  
55  
56  
57  
58  
59  
60

1  
2  
3 individuals utilizing mental healthcare (blue violins) increased, while somatic healthcare (green  
4  
5 violins) remained largely unchanged.  
6

7           Next, we addressed the development of healthcare consumption over time (Figure 2a-b).  
8  
9 Upper halves of figures (line charts) report the annual rates at which healthcare services were  
10  
11 provided to the parents before and after the attack. Bottom halves of figures (pie charts) report the  
12  
13 numbers and proportion of parents provided for within each six months period. Notably, in the early  
14  
15 aftermath of the attack, both primary and specialized mental healthcare services experienced  
16  
17 immediate increase in demand. In the delayed aftermath, healthcare acquisition largely appeared to  
18  
19 level out. Specifically, no second waves were observed. Model predictions of post- versus pre-  
20  
21 disaster healthcare consumption are summarized in Figure 3a-b. Addressing predicted rates of  
22  
23 *services utilized* (a), we found a significant increase in primary healthcare in both mothers and fathers,  
24  
25 both in the early and in the delayed aftermath. Additionally, significantly elevated consumption rates,  
26  
27 both early and delayed, were found in specialized mental healthcare consumption in mothers. In  
28  
29 fathers, service consumption could not be reliably bootstrapped, due to insufficient number of  
30  
31 occurrences. No significant changes were found in specialized somatic healthcare. Addressing  
32  
33 predicted proportions of *individuals utilizing the services* (b), we found a significant increase in  
34  
35 proportions of both mothers and fathers utilizing primary healthcare services in the early and the  
36  
37 delayed aftermath. In the specialized mental healthcare services, similarly, there were significantly  
38  
39 increased levels of both mothers and fathers utilizing services in the early aftermath. In the delayed  
40  
41 aftermath, the level of mothers, but not fathers, remained significantly increased. No significant  
42  
43 changes were found in specialized somatic healthcare. Sensitivity analyses, substituting average  
44  
45 three-year pre-disaster figures with data from the final year pre-disaster only, did not affect any  
46  
47 conclusions substantially.  
48  
49  
50  
51

52           Finally, we assessed the reasons for parents encountering the healthcare services in the  
53  
54 aftermath of the attack, as recorded by the primary healthcare providers at the time of the services'  
55  
56 provision (Figure 4). Notably, psychological health complaints dominated reasons for encountering in  
57  
58  
59  
60

1  
2  
3 both genders. In fact, 78.4% of mothers (n=174) and 47.1% of fathers (n=64) consulted their GP  
4  
5 about psychological complaints (ICPC-2, chapter "P") in the aftermath of the attack. More than one  
6  
7 third were diagnosed with depression (mothers n=42, 19.0%; fathers n=15, 11.0%), or PTSD (mothers  
8  
9 n=14, 6.3%; fathers n=10, 7.4%) or both (mothers n=9, 4.1%; fathers n=4, 2.9%). Individuals with  
10  
11 psychological health complaints were largely managed by primary healthcare, without receiving  
12  
13 specialized services (mothers n=106, 60.9%; fathers n=47, 73.4%).  
14  
15

## 16 17 18 DISCUSSION

19  
20 The aim of this study was to make a detailed description of pre- and post-disaster healthcare  
21  
22 consumption in parents of the Utøya terrorist attack survivors. In the previous, we have  
23  
24 demonstrated a significant post-disaster increase in both primary and specialized mental healthcare.  
25

26  
27 Primary healthcare, being the principal provider of healthcare services to parents both pre-  
28  
29 and post-disaster, increased promptly following the terrorist attack and peaked within the first six  
30  
31 months period. Largely attributable to psychological health complaints, the increase in healthcare  
32  
33 consumption echoed elevated levels of early distress previously demonstrated (27). Post-disaster  
34  
35 increase in healthcare consumption was most notable in female participants, possibly reflecting  
36  
37 gender differences in post-disaster stress reactions (36, 37). Potential barriers to accessing post-  
38  
39 disaster healthcare in men need to be addressed in future research.  
40

41  
42 An increase in proportion of parents acquiring specialized mental healthcare services post-  
43  
44 disaster was found. We have previously demonstrated that parental specialized healthcare  
45  
46 consumption after the Utøya terrorist attack was associated with post-traumatic stress reactions (27).  
47  
48 Thus, is in keeping with a recent registry-based study of the psychiatric diagnoses assigned by  
49  
50 Swedish specialized mental healthcare providers to survivors of the 2004 Southeast Asian Tsunami  
51  
52 (38), we hold that the increase in specialized mental healthcare consumption post-disaster largely  
53  
54 represented severely traumatized individuals in need of long-term mental healthcare. However, lack  
55  
56 of capacity or capability of primary healthcare in providing trauma-informed care, e.g. due to lack of  
57  
58  
59  
60

1  
2  
3 appropriate experience or expertise, may also have contributed to early referrals in some.

4  
5 Furthermore, it should be noted that, despite the substantial increase in their specialized mental  
6  
7 healthcare service consumption, overall, only a majority of parents did in fact utilize specialized  
8  
9 mental healthcare services post-disaster. Indeed, a majority of the parents were fully managed by  
10  
11 their GP.  
12

13  
14 Pre-trauma psychiatric history has previously been established as strongly predictive of post-  
15  
16 traumatic mental ill-health (39). In fact, a registry-based study of Danish survivors of the 2004  
17  
18 Southeast Asian Tsunami found that post-disaster specialized mental healthcare consumption, in  
19  
20 adjusted analyses, was significantly associated with the participants' three year pre-disaster history  
21  
22 of services consumption, rather than their post-disaster distress (40). Contrasting to this, in our study  
23  
24 post-disaster increase in specialized mental healthcare consumption stemmed largely from influx of  
25  
26 new individuals, rather than increased service consumption among those already provided for by the  
27  
28 services. Thus, we hold that disasters may not only potently intensify specialized mental healthcare  
29  
30 consumption in vulnerable individuals, but also channel high numbers of new individuals into the  
31  
32 services.  
33  
34  
35  
36  
37

### 38 Strengths and limitations

39  
40 The context of this study is a universal, public, accessible and well-developed healthcare system. The  
41  
42 study employs an objective measure on healthcare consumption, recorded by the healthcare  
43  
44 provider at the time of the healthcare service provision. The study allows for reliable comparison of  
45  
46 pre- and post-disaster data, with negligible levels of missing data. However, observed healthcare  
47  
48 consumption does not objectively reflect healthcare needs. Consumption may represent a  
49  
50 combination of perception of needs by a patient deciding to seek medical advice, as well as the  
51  
52 clinical judgement of a provider, who e.g. may encourage renewed contacts, make referrals etc.  
53  
54 Although being most applicable in similar clinical settings, we hold that our findings reflect  
55  
56 underlying post-disaster distress, and thus healthcare needs, arising in parents anywhere in the  
57  
58  
59  
60

1  
2  
3 world in the face of terror. Moreover, we believe that similar patterns of healthcare needs may  
4  
5 ensue after other traumatic exposure of parents, such as when child is struck by natural disaster,  
6  
7 traffic accident and serious illness.  
8

9  
10 In this study, we included only services provided by healthcare professionals. Thus, parts of  
11  
12 the proactive post-disaster outreach program were not included (27). Psychosocial support through  
13  
14 the outreach program may both have eased access to healthcare, thus increasing consumption, as  
15  
16 well as alleviated healthcare needs, thus decreasing consumption. No adjustment for participation in  
17  
18 the post-disaster outreach program was made. Finally, although uncommon due to universal  
19  
20 coverage of the national insurance scheme, some participants may have self-financed additional  
21  
22 healthcare services or obtained services abroad.  
23

#### 24 25 26 Conclusion

27  
28 Widespread unmet healthcare needs have been reported among survivors of terrorism (41). In this  
29  
30 study, we demonstrated that a surge in healthcare needs may not be limited to survivors of a  
31  
32 disaster, but may also include close family members, such as parent. Primary healthcare providers  
33  
34 may hold the key to a successful post-disaster intervention, providing timely trauma-informed care,  
35  
36 including swift referrals of individuals in need of specialized mental healthcare interventions.  
37  
38  
39  
40  
41  
42  
43  
44  
45  
46  
47  
48  
49  
50  
51  
52  
53  
54  
55  
56  
57  
58  
59  
60



## FIGURES

Figure 1 a-b: Split-violin diagram - distribution of parental healthcare service consumption before (left violin) and after (right violin) the terrorist attack. Vertical axis: number of services. Horizontal axis: modified Kernel estimates, distributions of mothers (a) and fathers (b).

Figure 2 a-b: Healthcare service consumption over time with rates of services (line chart) and proportion of individuals provided for (pie chart) in the three year periods before and after the attack (numeric values available in Supplementary table 3).

Figure 3 a-b: Ratios of pre- and post-disaster hurdle estimates of (a) overall service consumption and (b) proportions of individuals provided for by the services (numeric values available in Supplementary table 4).

<sup>a</sup> Ratio of estimates could not be reliably bootstrapped in our model.

Figure 4: Reasons for accessing the primary healthcare services, according to ICPC-2, in the three year periods before and after the terrorist attack. Categories with incidence of < 0.2 services per person per year are pooled ("other"). Width of bars corresponds to duration of time interval. Total number of services: 13,337. (numeric values available in Supplementary table 5).

## DECLARATIONS

Ethics approval and consent to participate

Consents to participation and collection of registry-based data were obtained in writing from all participants. The study was approved by the Regional Committees for Medical and Health Research Ethics in Norway.

Availability of data and material

Data supporting the findings of this study are not publicly available. The patient level, registry-based data may be accessed through the Norwegian Directorate of Health

1  
2  
3 (<https://helsedirektoratet.no/english>). Restrictions apply. Technical appendix and statistical code are  
4  
5 available from the corresponding author.  
6  
7

#### 8 9 Competing interests

10 All authors have completed the ICMJE uniform disclosure form at [www.icmje.org/coi\\_disclosure.pdf](http://www.icmje.org/coi_disclosure.pdf)  
11 and declare: The study was supported by the Norwegian Directorate of Health; JMH and LES have  
12 received research grants from the Norwegian Research Council; no other relationships or activities  
13 that could appear to have influenced the submitted work. All researchers worked independently  
14 from funders.  
15  
16  
17  
18  
19  
20  
21  
22  
23

#### 24 Funding

25 The research was funded by grants from the Norwegian Research Council and the Norwegian  
26 Directorate of Health.  
27  
28  
29  
30  
31  
32

#### 33 Authorship & contributorship

34 JMH, ST, LES and GD conceived of the study and developed the study design with TW-L. JMH, LES and  
35 GD gathered the data. JMH and TW-L conducted the statistical analyses. JMH wrote the first draft of  
36 the paper. All authors contributed to further drafts and approved the final submission, had full access  
37 to all of the data (including statistical reports and tables) in the study and can take responsibility for  
38 the integrity of the data and the accuracy of the data analysis. JMH is the guarantor of the  
39 manuscript being an honest, accurate, and transparent account of the study being reported; that no  
40 important aspects of the study have been omitted; and that any discrepancies from the study as  
41 planned (and, if relevant, registered) have been explained.  
42  
43  
44  
45  
46  
47  
48  
49  
50  
51  
52  
53  
54

#### 55 Copyright, open access, and permission to reuse

56  
57  
58  
59  
60

1  
2  
3 The Corresponding Author has the right to grant on behalf of all authors and does grant on behalf of  
4  
5 all authors, a worldwide licence to the Publishers and its licensees in perpetuity, in all forms, formats  
6  
7 and media (whether known now or created in the future), to i) publish, reproduce, distribute, display  
8  
9 and store the Contribution, ii) translate the Contribution into other languages, create adaptations,  
10  
11 reprints, include within collections and create summaries, extracts and/or, abstracts of the  
12  
13 Contribution, iii) create any other derivative work(s) based on the Contribution, iv) to exploit all  
14  
15 subsidiary rights in the Contribution, v) the inclusion of electronic links from the Contribution to third  
16  
17 party material where-ever it may be located; and, vi) licence any third party to do any or all of the  
18  
19 above.  
20  
21  
22  
23

#### 24 Acknowledgements

25  
26 The authors thank the participants of this study for their participation. The authors also thank the  
27  
28 Norwegian Directorate of Health - the Norwegian Health Economics Administration (HELFO) and the  
29  
30 Norwegian Patient Registry (NPR) for making healthcare registry data available to us.  
31  
32  
33  
34  
35  
36  
37  
38  
39  
40  
41  
42  
43  
44  
45  
46  
47  
48  
49  
50  
51  
52  
53  
54  
55  
56  
57  
58  
59  
60

Supplementary table 1 – Nature of the healthcare services provided to the study participants in the three year periods before and after the Utøya attack (total number of services: 19,208).

|                                         | Primary healthcare  |                    | Specialized mental healthcare |                    | Specialized somatic healthcare |                    |
|-----------------------------------------|---------------------|--------------------|-------------------------------|--------------------|--------------------------------|--------------------|
|                                         | before<br>(n=5,675) | after<br>(n=7,702) | before<br>(n=578)             | after<br>(n=1,501) | before<br>(n=1,836)            | after<br>(n=1,916) |
| outpatient, consultations               | 3130 (55.2)         | 4082 (53.0)        | 531 (91.9)                    | 1374 (91.5)        | 1631 (88.8)                    | 1694 (88.4)        |
| outpatient, other services <sup>a</sup> | 2545 (44.8)         | 3620 (47.0)        | 31 (5.4)                      | 112 (7.5)          | 67 (3.6)                       | 97 (5.1)           |
| inpatient, admissions <sup>b</sup>      | -                   | -                  | 16 (2.8)                      | 15 (1.0)           | 138 (7.5)                      | 125 (6.5)          |

<sup>a</sup> telephone consultations, mail correspondence etc.

<sup>b</sup> mean duration of admissions, pre- and post-disaster - mental healthcare – 10.7 days (SD 9.2) and 15.1 days (SD 17.2) - somatic healthcare - 5.4 days (SD 7.6) and 4.60 days (SD 6.9).

Supplementary table 2 - Incomplete entries missing patient id in the Norwegian Patient Registry<sup>1</sup>

a) Specialized mental healthcare services (by hospital)

| year | missing id (%) |
|------|----------------|
| 2008 | 5.80 %         |
| 2009 | 4.79 %         |
| 2010 | 0.78 %         |
| 2011 | 0.49 %         |
| 2012 | 0.53 %         |
| 2013 | 0.30 %         |
| 2014 | 0.25 %         |

b) Specialized somatic healthcare services (by hospital)

| year | missing id (%) |
|------|----------------|
| 2008 | 4.89 %         |
| 2009 | 3.31 %         |
| 2010 | 2.19 %         |
| 2011 | 2.18 %         |
| 2012 | 1.66 %         |
| 2013 | 1.32 %         |
| 2014 | 1.22 %         |

<sup>1</sup> Source: the Norwegian Patient Registry.

**Supplementary table 3** – Rates of healthcare service consumption in the three-year periods before and after the terrorist attack, annualized values (supplement to Figure 2).

|                                                    | mothers (n=222) |             |             | Fathers (n=136) |             |             |
|----------------------------------------------------|-----------------|-------------|-------------|-----------------|-------------|-------------|
|                                                    | primary         | mental      | somatic     | primary         | mental      | somatic     |
| <b>Before</b> (all services   consultations only)  |                 |             |             |                 |             |             |
| 2008-Jul-22 to 2009-Jan-21                         | 5.41   3.33     | 0.34   0.34 | 2.12   2.05 | 3.79   2.24     | 0.24   0.22 | 1.21   1.16 |
| 2009-Jan-22 to 2009-Jul-21                         | 5.98   3.05     | 0.41   0.39 | 1.49   1.46 | 3.57   1.93     | 0.19   0.19 | 0.87   0.72 |
| 2009-Jul-22 to 2010-Jan-21                         | 5.60   3.13     | 0.49   0.48 | 1.19   1.17 | 4.25   2.35     | 0.46   0.34 | 1.72   1.69 |
| 2010-Jan-22 to 2010-Jul-21                         | 6.08   3.14     | 0.47   0.44 | 1.76   1.64 | 4.10   2.46     | 0.87   0.87 | 2.00   1.97 |
| 2010-Jul-22 to 2011-Jan-21                         | 6.19   3.35     | 0.47   0.43 | 1.46   1.38 | 4.97   2.91     | 1.06   1.04 | 1.72   1.66 |
| 2011-Jan-22 to 2011-Jul-21                         | 6.13   3.17     | 0.72   0.64 | 1.49   1.40 | 5.00   2.85     | 0.74   0.71 | 1.96   1.94 |
| <b>After</b> (all services   consultations only)   |                 |             |             |                 |             |             |
| <i>early aftermath</i>                             |                 |             |             |                 |             |             |
| 2011-Jul-22 to 2011-Aug-21                         | 18.65   7.62    | 1.57   1.35 | 0.97   0.97 | 9.26   4.59     | 1.06   0.97 | 0.97   0.97 |
| 2011-Aug-22 to 2011-Sep-21                         | 14.65   7.57    | 3.46   3.03 | 1.89   1.84 | 7.15   3.88     | 0.79   0.79 | 1.59   1.50 |
| 2011-Sep-22 to 2011-Oct-21                         | 9.62   4.92     | 3.35   3.19 | 1.68   1.62 | 5.91   3.09     | 0.62   0.62 | 1.85   1.85 |
| 2011-Oct-22 to 2011-Nov-21                         | 9.57   5.19     | 3.51   3.30 | 1.41   1.41 | 7.15   3.88     | 0.44   0.44 | 2.74   2.74 |
| 2011-Nov-22 to 2011-Dec-21                         | 9.51   5.03     | 4.00   3.78 | 1.62   1.62 | 6.62   3.26     | 0.62   0.62 | 1.68   1.68 |
| 2011-Dec-22 to 2012-Jan-21                         | 7.24   3.68     | 3.30   2.97 | 1.03   0.86 | 6.44   3.79     | 0.62   0.62 | 2.03   1.85 |
| <i>delayed aftermath</i>                           |                 |             |             |                 |             |             |
| 2012-Jan-22 to 2012-Jul-21                         | 7.89   3.86     | 2.17   1.95 | 1.35   1.32 | 5.21   3.00     | 0.68   0.63 | 1.38   1.29 |
| 2012-Jul-22 to 2013-Jan-21                         | 7.67   4.25     | 1.53   1.43 | 2.09   2.01 | 5.32   3.31     | 0.68   0.63 | 1.26   1.22 |
| 2013-Jan-22 to 2013-Jul-21                         | 7.05   3.64     | 1.76   1.68 | 1.82   1.71 | 4.78   2.72     | 0.63   0.53 | 1.62   1.51 |
| 2013-Jul-22 to 2014-Jan-21                         | 7.52   4.10     | 1.32   1.24 | 1.95   1.86 | 5.26   3.04     | 0.69   0.59 | 1.50   1.38 |
| 2014-Jan-22 to 2014-Jul-21                         | 7.60   3.80     | 0.88   0.83 | 1.6   1.43  | 5.16   2.87     | 0.76   0.71 | 2.04   1.87 |
| <b>Summary</b> (all services   consultations only) |                 |             |             |                 |             |             |
| Average before                                     | 5.90   3.20     | 0.48   0.45 | 1.58   1.52 | 4.28   2.46     | 0.59   0.56 | 1.58   1.52 |
| Average after                                      | 8.21   4.22     | 1.81   1.68 | 1.71   1.62 | 5.47   3.12     | 0.69   0.63 | 1.60   1.51 |

primary: primary healthcare, mental: specialized mental healthcare, somatic: specialized somatic healthcare

Supplementary table 4: Hurdle predictions of (a) rates of healthcare service consumption and (b) proportion of individuals acquiring one or more services in each half year period (supplement to Figure 3).

|                       |               | mothers (n=222) |                              |                    |                              | fathers (n=136) |                              |                    |                              |
|-----------------------|---------------|-----------------|------------------------------|--------------------|------------------------------|-----------------|------------------------------|--------------------|------------------------------|
|                       |               | all services    |                              | consultations only |                              | all services    |                              | consultations only |                              |
|                       |               | estimate        | ratio, after/before (95% CI) | estimate           | ratio, after/before (95% CI) | estimate        | ratio, after/before (95% CI) | estimate           | ratio, after/before (95% CI) |
| <b>a) services</b>    |               |                 |                              |                    |                              |                 |                              |                    |                              |
| primary               | <i>before</i> | 5.92            |                              | 3.21               |                              | 0.71            |                              | 0.66               |                              |
|                       | after - early | 11.65           | 1.97 (1.76 - 2.23)           | 5.71               | 1.78 (1.57 - 2.02)           | 0.54            | 1.73 (1.36 - 2.29)           | 0.52               | 1.57 (1.28 - 1.91)           |
|                       | - delayed     | 7.57            | 1.28 (1.15 - 1.42)           | 3.97               | 1.24 (1.11 - 1.43)           | 0.76            | 1.20 (0.99 - 1.45)           | 0.68               | 1.26 (1.05 - 1.52)           |
|                       | - overall     | 8.26            | 1.40 (1.27 - 1.54)           | 4.26               | 1.33 (1.20 - 1.50)           | 0.73            | 1.29 (1.07 - 1.55)           | 0.66               | 1.31 (1.10 - 1.55)           |
| mental                | <i>before</i> | 0.46            |                              | 0.43               |                              | 0.71            |                              | 0.66               |                              |
|                       | after - early | 3.25            | 7.00 (3.86 - 19.02)          | 2.98               | 6.88 (3.84 - 18.95)          | 0.54            | 0.77 <sup>a</sup>            | 0.52               | 0.78 <sup>a</sup>            |
|                       | - delayed     | 1.48            | 3.20 (1.49 - 9.49)           | 1.38               | 3.19 (1.45 - 9.60)           | 0.76            | 1.07 <sup>a</sup>            | 0.68               | 1.03 <sup>a</sup>            |
|                       | - overall     | 1.78            | 3.84 (1.95 - 11.21)          | 1.65               | 3.82 (1.94 - 11.18)          | 0.73            | 1.03 <sup>a</sup>            | 0.66               | 1.00 <sup>a</sup>            |
| somatic               | <i>before</i> | 1.58            |                              | 1.52               |                              | 1.31            |                              | 1.26               |                              |
|                       | after - early | 1.48            | 0.93 (0.74 - 1.20)           | 1.43               | 0.94 (0.75 - 1.21)           | 1.64            | 1.25 (0.77 - 2.18)           | 1.59               | 1.26 (0.75 - 2.19)           |
|                       | - delayed     | 1.77            | 1.12 (0.86 - 1.44)           | 1.67               | 1.10 (0.84 - 1.44)           | 1.36            | 1.04 (0.75 - 1.51)           | 1.30               | 1.03 (0.73 - 1.48)           |
|                       | - overall     | 1.72            | 1.09 (0.85 - 1.37)           | 1.63               | 1.08 (0.84 - 1.37)           | 1.41            | 1.07 (0.79 - 1.52)           | 1.35               | 1.07 (0.78 - 1.52)           |
| <b>b) individuals</b> |               |                 |                              |                    |                              |                 |                              |                    |                              |
| primary               | <i>before</i> | 0.74            |                              | 0.63               |                              | 0.56            |                              | 0.49               |                              |
|                       | after - early | 0.88            | 1.19 (1.13 - 1.25)           | 0.79               | 1.26 (1.17 - 1.34)           | 0.74            | 1.31 (1.16 - 1.48)           | 0.66               | 1.36 (1.18 - 1.57)           |
|                       | - delayed     | 0.79            | 1.07 (1.03 - 1.11)           | 0.69               | 1.10 (1.04 - 1.16)           | 0.62            | 1.11 (1.02 - 1.21)           | 0.53               | 1.10 (0.99 - 1.21)           |
|                       | - overall     | 0.80            | 1.09 (1.05 - 1.13)           | 0.70               | 1.12 (1.07 - 1.18)           | 0.64            | 1.14 (1.05 - 1.24)           | 0.55               | 1.14 (1.04 - 1.26)           |
| mental                | <i>before</i> | 0.03            |                              | 0.03               |                              | 0.03            |                              | 0.03               |                              |
|                       | after - early | 0.22            | 6.68 (3.86 - 12.00)          | 0.22               | 6.55 (3.78 - 11.65)          | 0.08            | 3.14 (1.33 - 6.86)           | 0.08               | 3.14 (1.35 - 6.86)           |
|                       | - delayed     | 0.12            | 3.49 (2.00 - 6.38)           | 0.11               | 3.33 (1.90 - 6.12)           | 0.05            | 1.89 (0.84 - 3.96)           | 0.05               | 1.77 (0.73 - 3.60)           |
|                       | - overall     | 0.13            | 4.02 (2.34 - 7.22)           | 0.13               | 3.86 (2.25 - 6.92)           | 0.05            | 2.10 (0.95 - 4.18)           | 0.05               | 2.00 (0.86 - 3.75)           |
| somatic               | <i>before</i> | 0.35            |                              | 0.34               |                              | 0.28            |                              | 0.27               |                              |
|                       | after - early | 0.34            | 0.98 (0.82 - 1.15)           | 0.34               | 0.99 (0.83 - 1.16)           | 0.28            | 1.01 (0.80 - 1.24)           | 0.27               | 1.00 (0.78 - 1.23)           |
|                       | - delayed     | 0.34            | 0.99 (0.89 - 1.12)           | 0.34               | 0.99 (0.88 - 1.11)           | 0.30            | 1.08 (0.90 - 1.29)           | 0.30               | 1.08 (0.89 - 1.29)           |
|                       | - overall     | 0.34            | 0.99 (0.89 - 1.11)           | 0.34               | 0.99 (0.88 - 1.10)           | 0.30            | 1.07 (0.91 - 1.26)           | 0.29               | 1.07 (0.90 - 1.26)           |

primary: primary healthcare, mental: specialized mental healthcare, somatic: specialized somatic healthcare.

<sup>a</sup> Ratio could not be reliably bootstrapped in our model.

**Supplementary table 5:** Reasons for accessing primary healthcare services, according to ICPC-2, before and after the terrorist attack. Categories with incidence of < 0.2 services per person per year are pooled (supplement to Figure 4).

|                                        | ICPC-2 | mothers (n=222) |       |         | fathers (n=136) |       |         |
|----------------------------------------|--------|-----------------|-------|---------|-----------------|-------|---------|
|                                        |        | before          | early | delayed | before          | early | delayed |
| Overall                                |        | 5.90            | 11.54 | 7.56    | 4.28            | 7.09  | 5.15    |
| General and unspecified                | (A)    | 0.91            | 0.94  | 1.06    | 0.50            | 0.88  | 0.67    |
| Digestive                              | (D)    | 0.22            | 0.19  | 0.31    | 0.26            | 0.10  | 0.29    |
| Cardiovascular                         | (K)    | 0.29            | 0.29  | 0.51    | 0.55            | 0.76  | 0.65    |
| Musculoskeletal                        | (L)    | 1.36            | 1.21  | 1.60    | 1.10            | 0.84  | 1.07    |
| Psychological                          | (P)    | 0.80            | 6.47  | 1.63    | 0.36            | 2.50  | 0.83    |
| Respiratory                            | (R)    | 0.62            | 0.86  | 0.74    | 0.45            | 0.76  | 0.39    |
| Skin                                   | (S)    | 0.26            | 0.14  | 0.28    | 0.25            | 0.28  | 0.38    |
| Endocrine/Metabolic<br>and Nutritional | (T)    | 0.32            | 0.26  | 0.37    | 0.34            | 0.57  | 0.36    |
| Other                                  |        | 1.13            | 1.19  | 1.05    | 0.47            | 0.38  | 0.51    |



## References:

1. First MB. Diagnostic and statistical manual of mental disorders. DSM IV-4th edition APA p. 1994:97-327.
2. Scrimin S, Axia G, Capello F, Moscardino U, Steinberg AM, Pynoos RS. Posttraumatic reactions among injured children and their caregivers 3 months after the terrorist attack in Beslan. *Psychiatry research*. 2006;141(3):333-6.
3. Dyb G, Jensen TK, Nygaard E, Ekeberg O, Diseth TH, Wentzel-Larsen T, et al. Post-traumatic stress reactions in survivors of the 2011 massacre on Utoya Island, Norway. *The British journal of psychiatry : the journal of mental science*. 2013.
4. Suomalainen L, Haravuori H, Berg N, Kiviruusu O, Marttunen M. A controlled follow-up study of adolescents exposed to a school shooting--psychological consequences after four months. *European psychiatry : the journal of the Association of European Psychiatrists*. 2011;26(8):490-7.
5. Barron J. Nation Reels After Gunman Massacres 20 Children at School in Connecticut. *The New York Times*. 2012.
6. Paris attacks: What happened on the night. *BBC*. 2015.
7. Orlando Shooting. *The New York Times*. 2016.
8. Schmidt M, Azoulay E. Having a loved one in the ICU: the forgotten family. *Current opinion in critical care*. 2012;18(5):540-7.
9. Nelson LP, Gold JJ. Posttraumatic stress disorder in children and their parents following admission to the pediatric intensive care unit: a review. *Pediatric critical care medicine : a journal of the Society of Critical Care Medicine and the World Federation of Pediatric Intensive and Critical Care Societies*. 2012;13(3):338-47.
10. Cabizuca M, Marques-Portella C, Mendlowicz MV, Coutinho ES, Figueira I. Posttraumatic stress disorder in parents of children with chronic illnesses: a meta-analysis. *Health psychology : official journal of the Division of Health Psychology, American Psychological Association*. 2009;28(3):379-88.
11. Vanderwerker LC, Laff RE, Kadan-Lottick NS, McColl S, Prigerson HG. Psychiatric disorders and mental health service use among caregivers of advanced cancer patients. *Journal of clinical oncology : official journal of the American Society of Clinical Oncology*. 2005;23(28):6899-907.
12. Kassam-Adams N, Fleisher CL, Winston FK. Acute stress disorder and posttraumatic stress disorder in parents of injured children. *Journal of traumatic stress*. 2009;22(4):294-302.
13. Allenou C, Olliac B, Bourdet-Loubere S, Brunet A, David AC, Claudet I, et al. Symptoms of traumatic stress in mothers of children victims of a motor vehicle accident. *Depression and anxiety*. 2010;27(7):652-7.
14. Dyb G, Holen A, Steinberg AM, Rodriguez N, Pynoos RS. Alleged sexual abuse at a day care center: impact on parents. *Child abuse & neglect*. 2003;27(8):939-50.
15. Timmons-Mitchell J, Chandler-Holtz D, Semple WE. Post-traumatic stress symptoms in mothers following children's reports of sexual abuse: an exploratory study. *The American journal of orthopsychiatry*. 1996;66(3):463-7.
16. Dirkzwager AJ, Bramsen I, Ader H, van der Ploeg HM. Secondary traumatization in partners and parents of Dutch peacekeeping soldiers. *Journal of family psychology : JFP : journal of the Division of Family Psychology of the American Psychological Association (Division 43)*. 2005;19(2):217-26.
17. Slaven-Lee PW, Padden D, Andrews CM, Fitzpatrick JJ. Emotional distress and health risk behaviours of mothers of United States Marines. *International nursing review*. 2011;58(2):164-70.
18. Schuster MA, Stein BD, Jaycox L, Collins RL, Marshall GN, Elliott MN, et al. A national survey of stress reactions after the September 11, 2001, terrorist attacks. *The New England journal of medicine*. 2001;345(20):1507-12.

19. Rubin GJ, Brewin CR, Greenberg N, Simpson J, Wessely S. Psychological and behavioural reactions to the bombings in London on 7 July 2005: cross sectional survey of a representative sample of Londoners. *BMJ (Clinical research ed)*. 2005;331(7517):606.
20. Rubin GJ, Brewin CR, Greenberg N, Hughes JH, Simpson J, Wessely S. Enduring consequences of terrorism: 7-month follow-up survey of reactions to the bombings in London on 7 July 2005. *The British journal of psychiatry : the journal of mental science*. 2007;190:350-6.
21. Thoresen S, Aakvaag HF, Wentzel-Larsen T, Dyb G, Hjemdal OK. The day Norway cried: Proximity and distress in Norwegian citizens following the 22nd July 2011 terrorist attacks in Oslo and on Utoya Island. *European journal of psychotraumatology*. 2012;3.
22. Miguel-Tobal JJ, Cano-Vindel A, Gonzalez-Ordi H, Iruarrizaga I, Rudenstine S, Vlahov D, et al. PTSD and depression after the Madrid March 11 train bombings. *Journal of traumatic stress*. 2006;19(1):69-80.
23. Gabriel R, Ferrando L, Corton ES, Mingote C, Garcia-Camba E, Liria AF, et al. Psychopathological consequences after a terrorist attack: an epidemiological study among victims, the general population, and police officers. *European psychiatry : the journal of the Association of European Psychiatrists*. 2007;22(6):339-46.
24. Stene LE, Dyb G. Health service utilization after terrorism: a longitudinal study of survivors of the 2011 Utoya attack in Norway. *BMC health services research*. 2015;15:158.
25. Rodriguez JJ, Kohn R. Use of mental health services among disaster survivors. *Current opinion in psychiatry*. 2008;21(4):370-8.
26. Green DC, Buehler JW, Silk BJ, Thompson NJ, Schild LA, Klein M, et al. Trends in healthcare use in the New York City region following the Terrorist Attacks of 2001. *Biosecurity and bioterrorism : biodefense strategy, practice, and science*. 2006;4(3):263-75.
27. Haga JM, Stene LE, Wentzel-Larsen T, Thoresen S, Dyb G. Early postdisaster health outreach to modern families: a cross-sectional study. *BMJ open*. 2015;5(12):e009402.
28. Thoresen S, Jensen TK, Wentzel-Larsen T, Dyb G. Parents of terror victims. A longitudinal study of parental mental health following the 2011 terrorist attack on Utoya Island. *Journal of anxiety disorders*. 2016;38:47-54.
29. Bugge I, Dyb G, Stensland SO, Ekeberg O, Wentzel-Larsen T, Diseth TH. Physical injury and posttraumatic stress reactions. A study of the survivors of the 2011 shooting massacre on Utoya Island, Norway. *Journal of psychosomatic research*. 2015;79(5):384-90.
30. Dyb G, Jensen T, Glad KA, Nygaard E, Thoresen S. Early outreach to survivors of the shootings in Norway on the 22nd of July 2011. *European journal of psychotraumatology*. 2014;5.
31. Ringard A, Sagan A, Sperre Saunes I, Lindahl AK. Norway: health system review. *Health systems in transition*. 2013;15(8):1-162.
32. Stene LE, Dyb G. Research participation after terrorism: an open cohort study of survivors and parents after the 2011 Utoya attack in Norway. *BMC research notes*. 2016;9:57.
33. World Organization of Family Doctors (Wonca). ICPC-2-R. International Classification of Primary Care. Revised Second Edition. Oxford: Oxford University Press 2005.
34. Britt H, Angelis M, Harris E. The reliability and validity of doctor-recorded morbidity data in active data collection systems. *Scandinavian journal of primary health care*. 1998;16(1):50-5.
35. Zeileis A KC, Jackman S. Regression models for count data in R. *J Stat Softw* 2008;27:1-25.
36. Olff M, Langeland W, Draijer N, Gersons BP. Gender differences in posttraumatic stress disorder. *Psychological bulletin*. 2007;133(2):183-204.
37. Tolin DF, Foa EB. Sex differences in trauma and posttraumatic stress disorder: a quantitative review of 25 years of research. *Psychological bulletin*. 2006;132(6):959-92.
38. Arnberg FK, Gudmundsdottir R, Butwicka A, Fang F, Lichtenstein P, Hultman CM, et al. Psychiatric disorders and suicide attempts in Swedish survivors of the 2004 southeast Asia tsunami: a 5 year matched cohort study. *The lancet Psychiatry*. 2015;2(9):817-24.
39. Breslau N. The epidemiology of trauma, PTSD, and other posttrauma disorders. *Trauma, violence & abuse*. 2009;10(3):198-210.

1  
2  
3  
4  
5  
6  
7  
8  
9  
10  
11  
12  
13  
14  
15  
16  
17  
18  
19  
20  
21  
22  
23  
24  
25  
26  
27  
28  
29  
30  
31  
32  
33  
34  
35  
36  
37  
38  
39  
40  
41  
42  
43  
44  
45  
46  
47  
48  
49  
50  
51  
52  
53  
54  
55  
56  
57  
58  
59  
60

40. Rosendal S, Mortensen EL, Andersen HS, Heir T. Use of health care services before and after a natural disaster among survivors with and without PTSD. *Psychiatric services (Washington, DC)*. 2014;65(1):91-7.

41. Brewin CR, Fuchkan N, Huntley Z, Robertson M, Thompson M, Scragg P, et al. Outreach and screening following the 2005 London bombings: usage and outcomes. *Psychological medicine*. 2010;40(12):2049-57.

For peer review only

**a) mothers (n=222)**

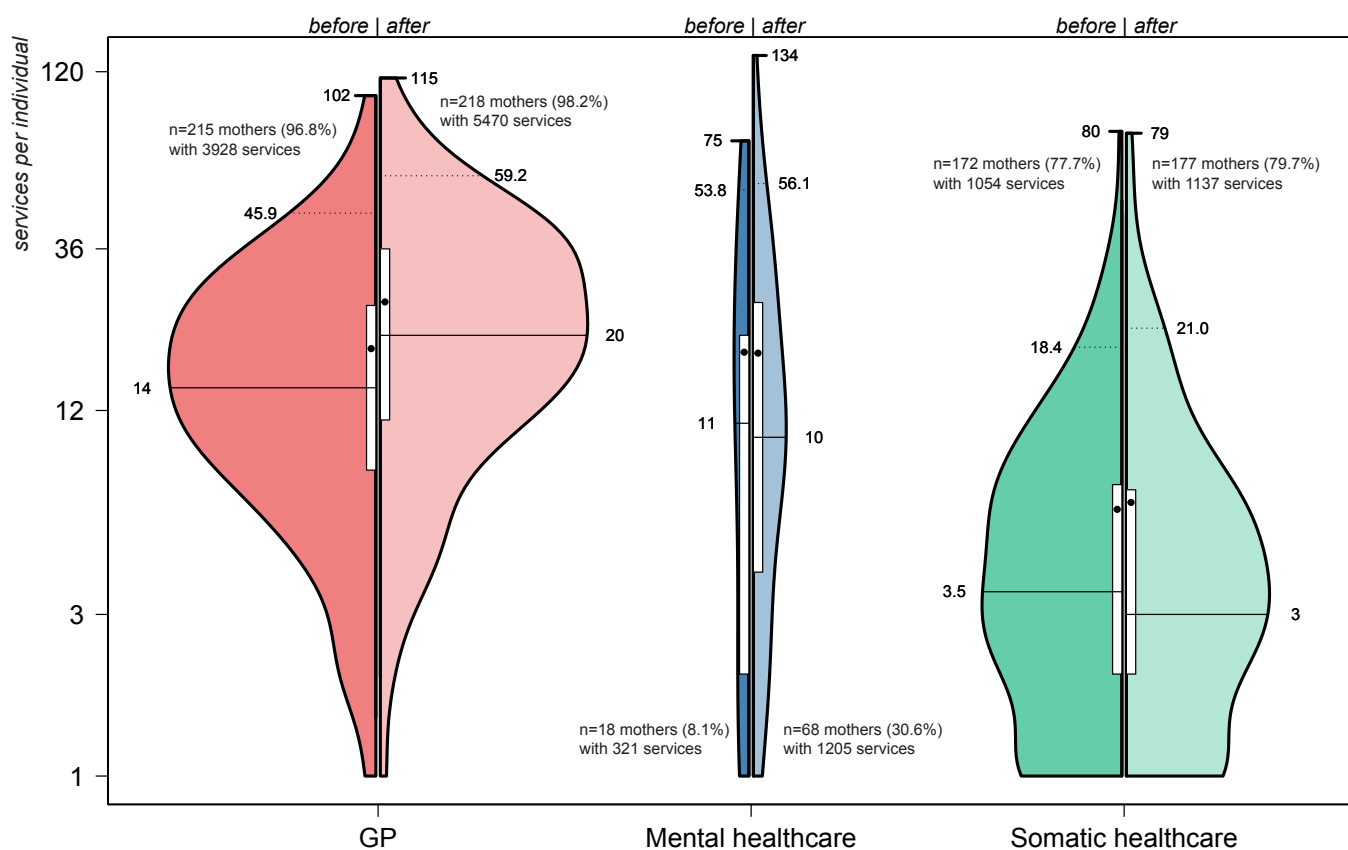

**b) fathers (n=136)**

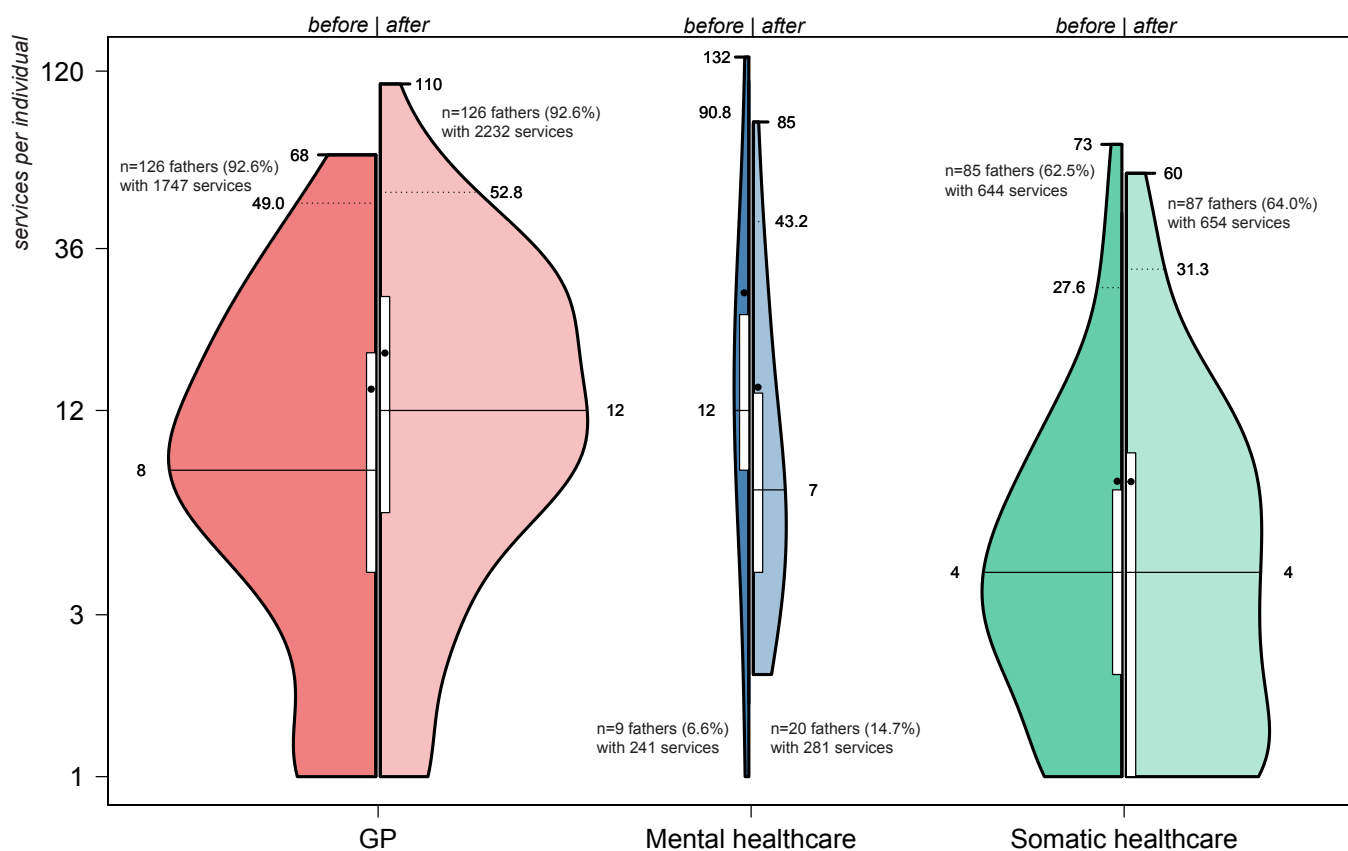

Colored areas/violins: Kernel density estimations, multiplied by proportion of mothers and fathers having utilized services pre- and post-disaster (left and right violin, respectively). White vertical box: inter quartile range (Q1-Q3). Solid horizontal line: median value. Black bullet: mean value. Dotted horizontal line: 95th percentile. Upper edge: maximum value.

**a) mothers (n=222)**

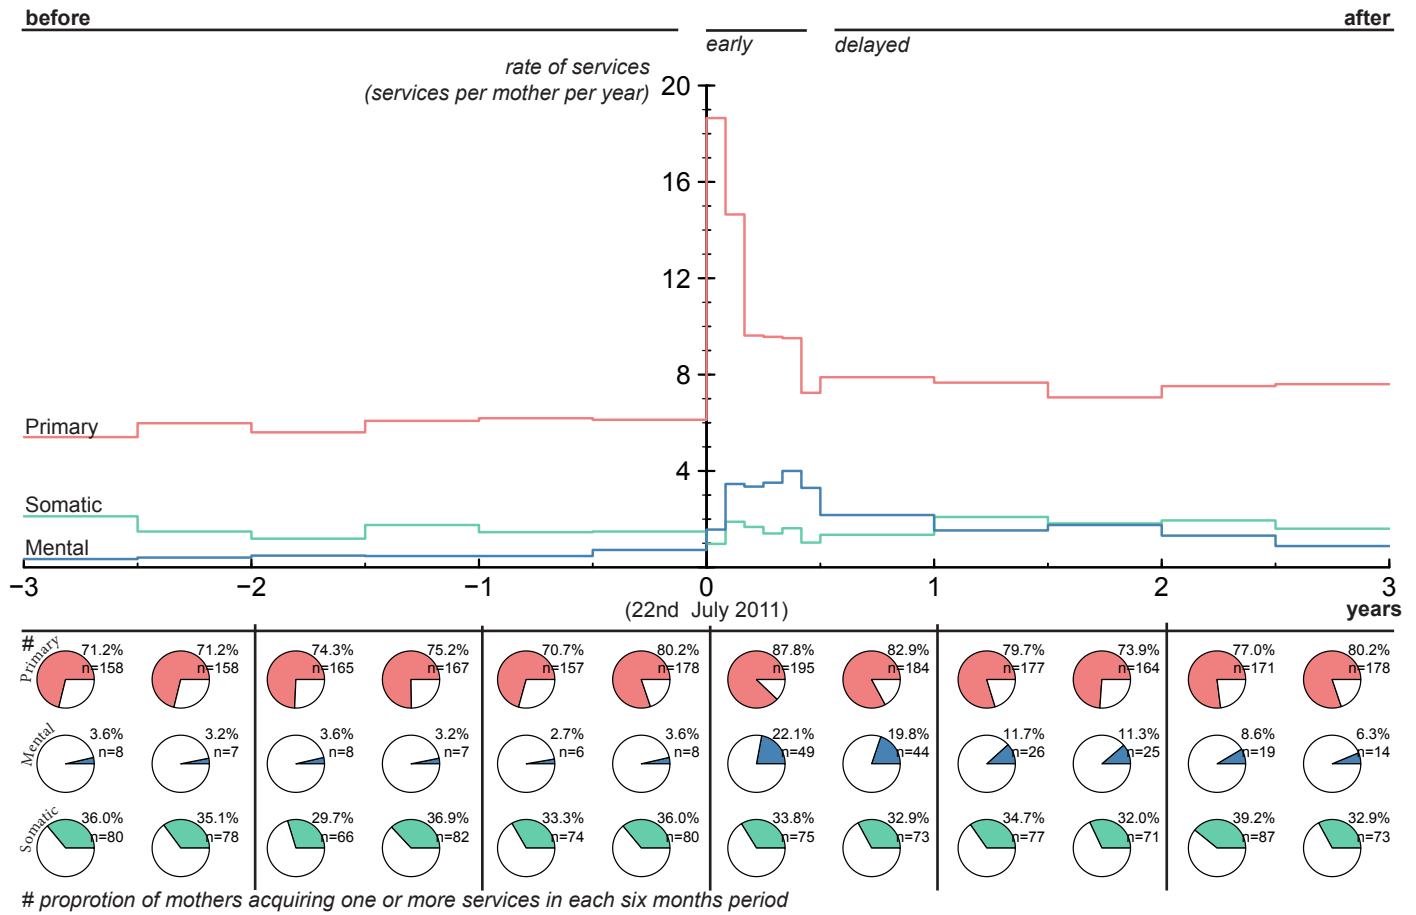

**b) fathers (n=136)**

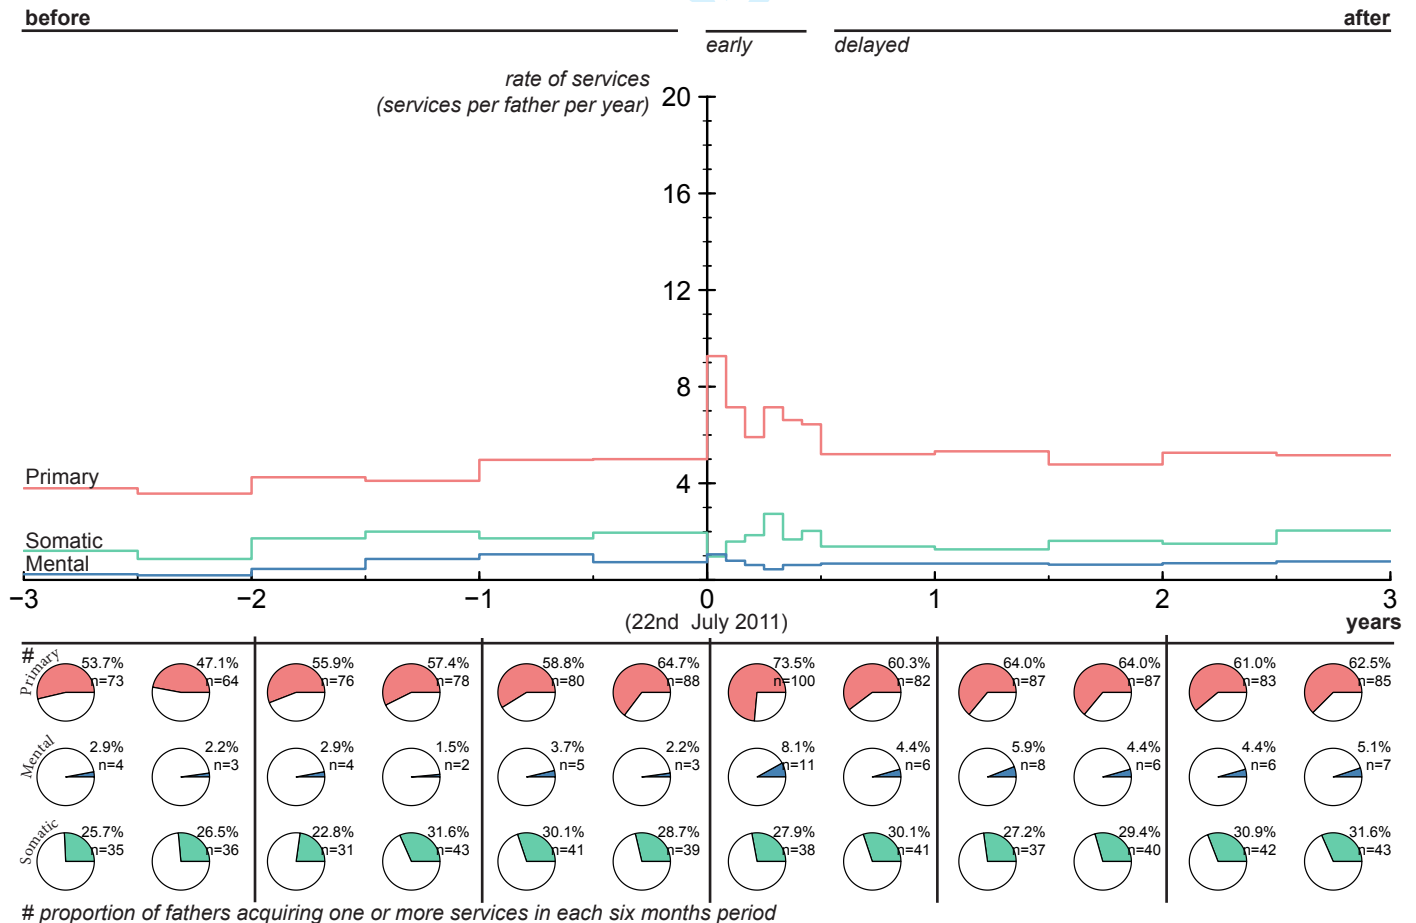

primary: primary healthcare - mental: specialized mental healthcare - somatic: specialized somatic healthcare.

**a) services**

**primary**

- early after
- delayed after
- overall

**mental**

- early after
- delayed after
- overall

**somatic**

- early after
- delayed after
- overall

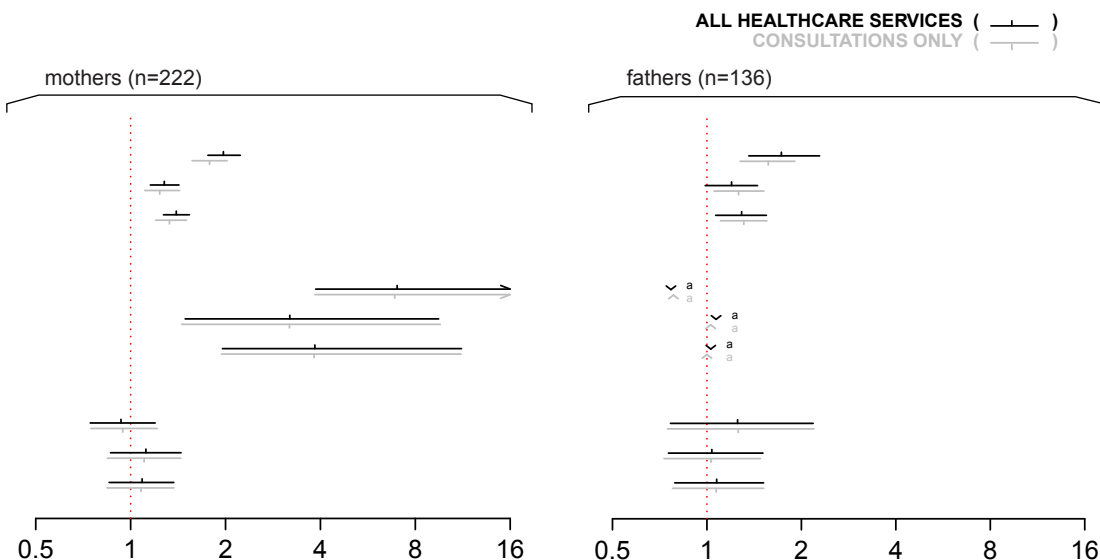

**b) individuals**

**primary**

- early after
- delayed after
- overall

**mental**

- early after
- delayed after
- overall

**somatic**

- early after
- delayed after
- overall

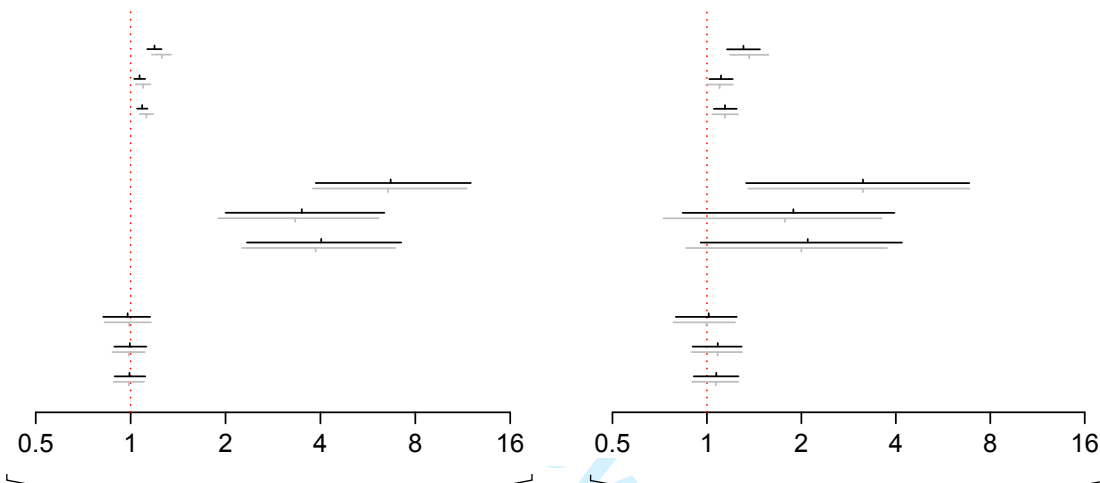

**rate ratio, 95% CI**  
 (->) in favor of post-disaster increase

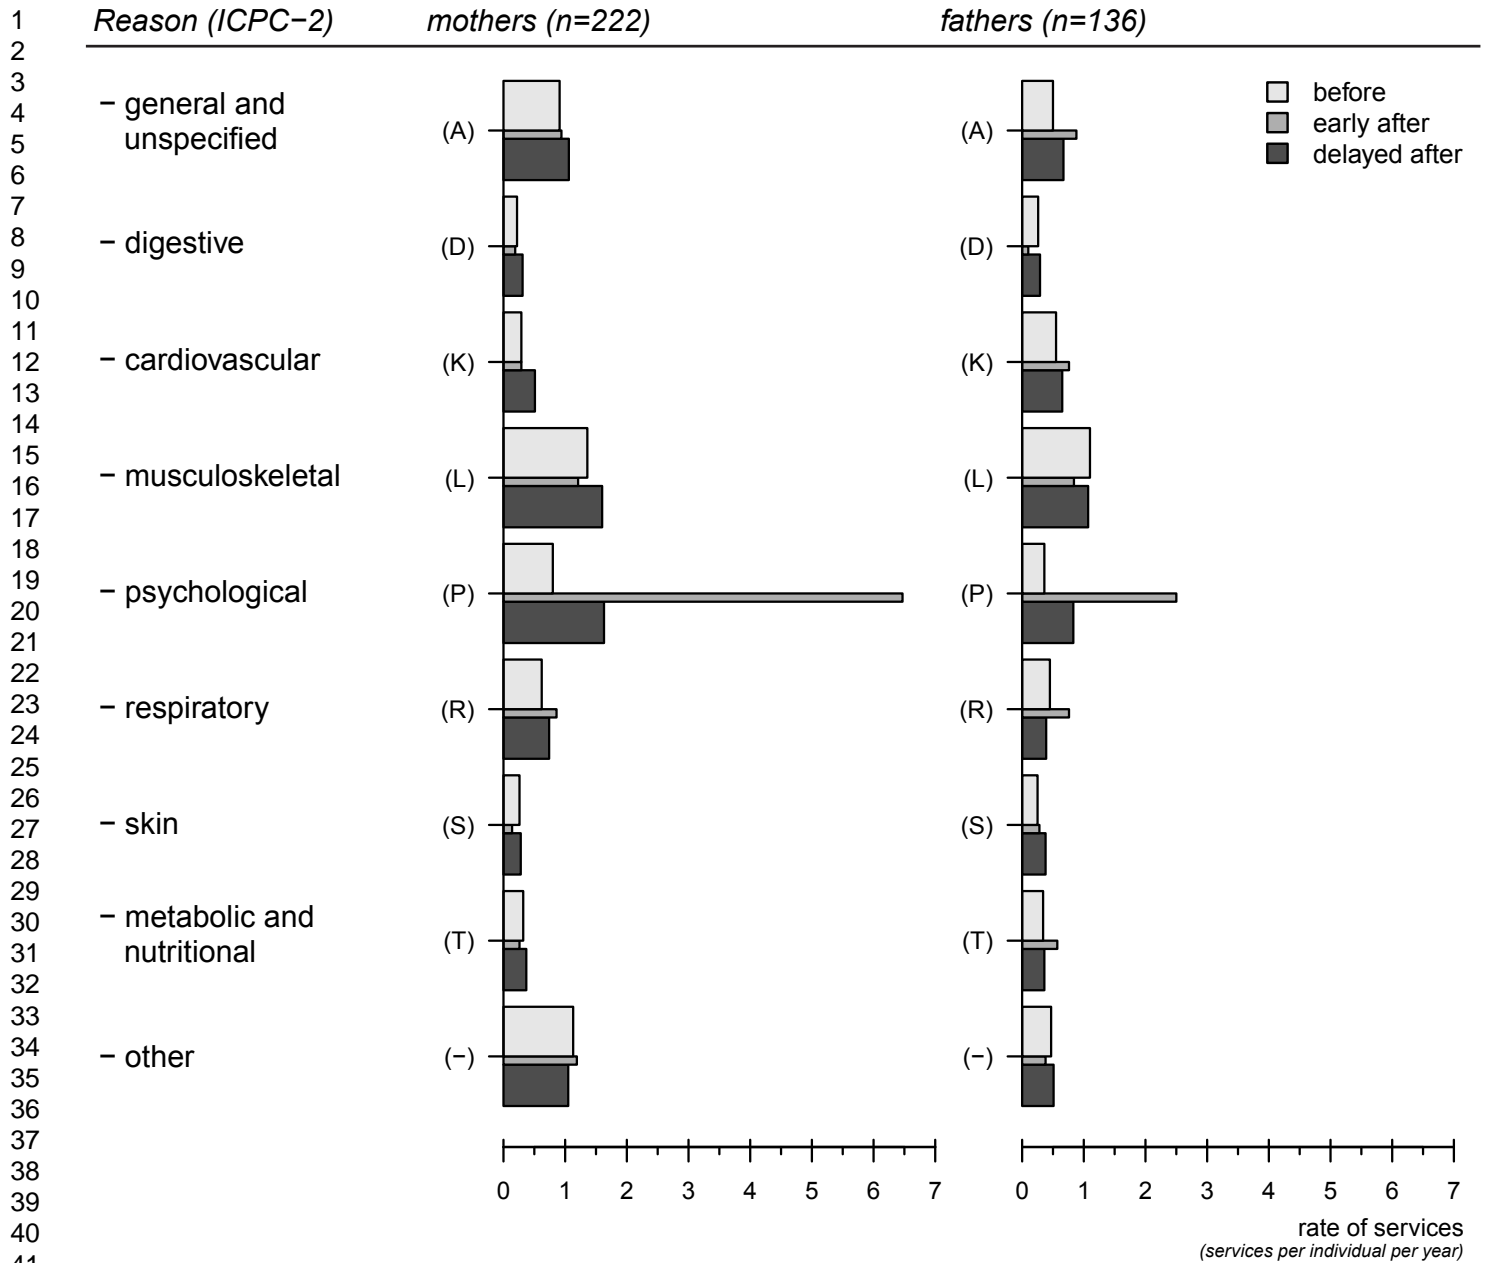

only

1  
2  
3  
4  
5  
6  
7  
8  
9  
10  
11  
12  
13  
14  
15  
16  
17  
18  
19  
20  
21  
22  
23  
24  
25  
26  
27  
28  
29  
30  
31  
32  
33  
34  
35  
36  
37  
38  
39  
40  
41  
42  
43  
44  
45  
46  
47  
48  
49  
50  
51  
52  
53  
54  
55  
56  
57  
58  
59  
60

STROBE statement?checklist of items that should be included in reports of observational studies

|                           | Item No | Recommendation                                                                                                                                                                                                                                                                                                                                                                                                    |
|---------------------------|---------|-------------------------------------------------------------------------------------------------------------------------------------------------------------------------------------------------------------------------------------------------------------------------------------------------------------------------------------------------------------------------------------------------------------------|
| <b>Title and abstract</b> |         |                                                                                                                                                                                                                                                                                                                                                                                                                   |
|                           | 1       | (a) Indicate the study's design with a commonly used term in the title or the abstract<br>OK. Page 1.                                                                                                                                                                                                                                                                                                             |
|                           |         | (b) Provide in the abstract an informative and balanced summary of what was done and what was found<br>OK. Page 3.                                                                                                                                                                                                                                                                                                |
| <b>Introduction</b>       |         |                                                                                                                                                                                                                                                                                                                                                                                                                   |
| Background/rationale      | 2       | Explain the scientific background and rationale for the investigation being reported<br>OK. Page 5.                                                                                                                                                                                                                                                                                                               |
| Objectives                | 3       | State specific objectives, including any prespecified hypotheses<br>OK. Page 6.                                                                                                                                                                                                                                                                                                                                   |
| <b>Methods</b>            |         |                                                                                                                                                                                                                                                                                                                                                                                                                   |
| Study design              | 4       | Present key elements of study design early in the paper<br>OK. Page 7.                                                                                                                                                                                                                                                                                                                                            |
| Setting                   | 5       | Describe the setting, locations, and relevant dates, including periods of recruitment, exposure, follow-up, and data collection<br>OK. Page 6-7.                                                                                                                                                                                                                                                                  |
| Participants              | 6       | (a) <i>Cohort study?</i> Give the eligibility criteria, and the sources and methods of selection of participants. Describe methods of follow-up<br><i>Case-control study?</i> Give the eligibility criteria, and the sources and methods of case ascertainment and control selection. Give the rationale for the choice of cases and controls<br><i>Cross sectional study?</i> Give the eligibility criteria, and |



|                           | Item No | Recommendation                                                                                                                                                                                                                  |
|---------------------------|---------|---------------------------------------------------------------------------------------------------------------------------------------------------------------------------------------------------------------------------------|
|                           |         | <p>the sources and methods of selection of participants</p> <p>OK. Page 7.</p>                                                                                                                                                  |
|                           |         | <p>(b) Cohort study? For matched studies, give matching criteria and number of exposed and unexposed</p> <p>Case-control study? For matched studies, give matching criteria and the number of controls per case</p> <p>N/A.</p> |
| Variables                 | 7       | <p>Clearly define all outcomes, exposures, predictors, potential confounders, and effect modifiers. Give diagnostic criteria, if applicable</p> <p>OK. Page 8-9.</p>                                                            |
| Data sources/ measurement | 8*      | <p>For each variable of interest, give sources of data and details of methods of assessment (measurement). Describe comparability of assessment methods if there is more than one group</p> <p>OK. Page 8-9.</p>                |
| Bias                      | 9       | <p>Describe any efforts to address potential sources of bias</p> <p>OK. Page 13.</p>                                                                                                                                            |
| Study size                | 10      | <p>Explain how the study size was arrived at</p> <p>OK. Page 7-8.</p>                                                                                                                                                           |
| Quantitative variables    | 11      | <p>Explain how quantitative variables were handled in the analyses. If applicable, describe which groupings were chosen and why</p> <p>OK. Page 9-10.</p>                                                                       |
| Statistical methods       | 12      | <p>(a) Describe all statistical methods, including those used to control for confounding</p> <p>OK. Page 9-10.</p> <p>(b) Describe any methods used to examine subgroups and</p>                                                |

|                  | Item No | Recommendation                                                                                                                                                                                                                                                                   |
|------------------|---------|----------------------------------------------------------------------------------------------------------------------------------------------------------------------------------------------------------------------------------------------------------------------------------|
|                  |         | interactions<br>N/A                                                                                                                                                                                                                                                              |
|                  |         | (c) Explain how missing data were addressed<br>OK. Page 9-10.                                                                                                                                                                                                                    |
|                  |         | (d) Cohort study?If applicable, explain how loss to follow-up was addressedCase-control study?If applicable, explain how matching of cases and controls was addressedCross sectional study?If applicable, describe analytical methods taking account of sampling strategy<br>N/A |
|                  |         | (e) Describe any sensitivity analyses<br>OK. Page 9-10.                                                                                                                                                                                                                          |
| <b>Results</b>   |         |                                                                                                                                                                                                                                                                                  |
| Participants     | 13*     | (a) Report numbers of individuals at each stage of study?eg numbers potentially eligible, examined for eligibility, confirmed eligible, included in the study, completing follow-up, and analysed<br>OK. Page 7-8.                                                               |
|                  |         | (b) Give reasons for non-participation at each stage<br>OK. Page 7-8.                                                                                                                                                                                                            |
|                  |         | (c) Consider use of a flow diagram<br>Not used.                                                                                                                                                                                                                                  |
| Descriptive data | 14*     | (a) Give characteristics of study participants (eg demographic, clinical, social) and information on exposures and potential confounders<br>OK. Page 7-8                                                                                                                         |
|                  |         | (b) Indicate number of                                                                                                                                                                                                                                                           |

|                   | Item No | Recommendation                                                                                                                                                                                                                          |
|-------------------|---------|-----------------------------------------------------------------------------------------------------------------------------------------------------------------------------------------------------------------------------------------|
|                   |         | <p>participants with missing data for each variable of interest</p> <p>OK. Page 7-8</p>                                                                                                                                                 |
|                   |         | (c) <i>Cohort study</i> ? Summarise follow-up time (eg average and total amount)                                                                                                                                                        |
| Outcome data      | 15*     | <p><i>Cohort study</i>? Report numbers of outcome events or summary measures over time</p> <p>OK. Page 10-11</p>                                                                                                                        |
|                   |         | <i>Case-control study</i> ? Report numbers in each exposure category, or summary measures of exposure                                                                                                                                   |
|                   |         | <i>Cross sectional study</i> ? Report numbers of outcome events or summary measures                                                                                                                                                     |
| Main results      | 16      | <p>(a) Report the numbers of individuals at each stage of the study? eg numbers potentially eligible, examined for eligibility, confirmed eligible, included in the study, completing follow-up, and analysed</p> <p>OK. Page 10-11</p> |
|                   |         | (b) Give reasons for non-participation at each stage                                                                                                                                                                                    |
|                   |         | (c) Consider use of a flow diagram                                                                                                                                                                                                      |
| Other analyses    | 17      | <p>Report other analyses done? eg analyses of subgroups and interactions, and sensitivity analyses</p> <p>OK. Page 11</p>                                                                                                               |
| <b>Discussion</b> |         |                                                                                                                                                                                                                                         |
| Key results       | 18      | <p>Summarise key results with reference to study objectives</p> <p>OK. Page 12-13</p>                                                                                                                                                   |
| Limitations       | 19      | <p>Discuss limitations of the study, taking into account sources of potential bias or imprecision. Discuss both direction and magnitude of any potential bias</p>                                                                       |

|                          | Item No | Recommendation                                                                                                                                                                               |
|--------------------------|---------|----------------------------------------------------------------------------------------------------------------------------------------------------------------------------------------------|
|                          |         | OK. Page 13                                                                                                                                                                                  |
| Interpretation           | 20      | Give a cautious overall interpretation of results considering objectives, limitations, multiplicity of analyses, results from similar studies, and other relevant evidence<br>OK. Page 12-13 |
| Generalisability         | 21      | Discuss the generalisability (external validity) of the study results<br>OK. Page 13                                                                                                         |
| <b>Other information</b> |         |                                                                                                                                                                                              |
| Funding                  | 22      | Give the source of funding and the role of the funders for the present study and, if applicable, for the original study on which the present article is based<br>OK. Page 15                 |

# BMJ Open

## Healthcare consumption in parents of young terrorism survivors: A registry-based study in Norway

|                                 |                                                                                                                                                                                                                                                                                                                                                                                                                                                                                                                                                                                                                          |
|---------------------------------|--------------------------------------------------------------------------------------------------------------------------------------------------------------------------------------------------------------------------------------------------------------------------------------------------------------------------------------------------------------------------------------------------------------------------------------------------------------------------------------------------------------------------------------------------------------------------------------------------------------------------|
| Journal:                        | <i>BMJ Open</i>                                                                                                                                                                                                                                                                                                                                                                                                                                                                                                                                                                                                          |
| Manuscript ID                   | bmjopen-2017-018358.R1                                                                                                                                                                                                                                                                                                                                                                                                                                                                                                                                                                                                   |
| Article Type:                   | Research                                                                                                                                                                                                                                                                                                                                                                                                                                                                                                                                                                                                                 |
| Date Submitted by the Author:   | 19-Sep-2017                                                                                                                                                                                                                                                                                                                                                                                                                                                                                                                                                                                                              |
| Complete List of Authors:       | Haga, Jon Magnus; Institute of Clinical Medicine, Faculty of Medicine, University of Oslo; Norwegian Centre of Violence and Traumatic Stress Studies<br>Thoresen, Siri; Norwegian Centre of Violence and Traumatic Stress Studies, Stene, Lise; Norwegian Centre of Violence and Traumatic Stress Studies, Wentzel-Larsen, Tore; Norwegian Centre of Violence and Traumatic Stress Studies; Centre for Child and Adolescent Mental Health, Eastern and Southern Norway<br>Dyb, Grete; Norwegian Centre of Violence and Traumatic Stress Studies; Institute of Clinical Medicine, Faculty of Medicine, University of Oslo |
| <b>Primary Subject Heading</b>: | Health services research                                                                                                                                                                                                                                                                                                                                                                                                                                                                                                                                                                                                 |
| Secondary Subject Heading:      | Mental health, General practice / Family practice, Health services research, Public health                                                                                                                                                                                                                                                                                                                                                                                                                                                                                                                               |
| Keywords:                       | Terrorism, Posttraumatic stress disorder (PTSD), PRIMARY CARE, MENTAL HEALTH, Parents, Disaster                                                                                                                                                                                                                                                                                                                                                                                                                                                                                                                          |
|                                 |                                                                                                                                                                                                                                                                                                                                                                                                                                                                                                                                                                                                                          |

SCHOLARONE™  
Manuscripts

only

1  
2  
3 FULL TITLE4 **Healthcare consumption in parents of young terrorism survivors: A registry-based study in Norway**5 Jon Magnus Haga, Siri Thoresen, Lise Eilin Stene, Tore Wentzel-Larsen, Grete Dyb.  
6  
7  
8  
910  
11 Jon Magnus Haga, MD

12 Norwegian Centre of Violence and Traumatic Stress Studies (NKVTS), Oslo, Norway

13 Institute of Clinical Medicine, Faculty of Medicine, University of Oslo, Oslo, Norway  
14  
15  
16  
1718  
19  
20 Siri Thoresen, PhD21 Norwegian Centre of Violence and Traumatic Stress Studies (NKVTS), Oslo, Norway  
22  
23  
2425  
26 Lise Eilin Stene, MD/PhD27 Norwegian Centre of Violence and Traumatic Stress Studies (NKVTS), Oslo, Norway  
28  
29  
30  
3132  
33 Tore Wentzel-Larsen, MSc

34 Norwegian Centre of Violence and Traumatic Stress Studies (NKVTS), Oslo, Norway

35 Centre for Child and Adolescent Mental Health, Eastern and Southern Norway, Oslo, Norway  
36  
37  
38  
3940  
41 Grete Dyb, MD/PhD

42 Norwegian Centre of Violence and Traumatic Stress Studies (NKVTS), Oslo, Norway

43 Institute of Clinical Medicine, Faculty of Medicine, University of Oslo, Oslo, Norway  
44  
45  
46  
47  
4849  
50 Correspondence to: Jon Magnus Haga, [j.m.haga@medisin.uio.no](mailto:j.m.haga@medisin.uio.no)  
51  
52  
53  
54  
55  
56  
57  
58  
59  
60

1  
2  
3 ABSTRACT

4  
5 **Objectives:** To assess changes in parents' short- and long-term primary and specialized healthcare  
6  
7 consumption following a terrorist attack threatening the lives of their children.

8  
9 **Design:** Registry-based study comparing healthcare service consumption, in the three years before  
10  
11 and the three years after a terrorist attack.

12  
13 **Setting:** The aftermath of the Utøya terrorist attack. The regular, publicly-funded, universal  
14  
15 healthcare system in Norway.

16  
17 **Intervention:** Parents learning of a terrorist attack on their adolescent and young adult child.

18  
19 **Participants:** Mothers (n=226) and fathers (n=141) of a total of 263 survivors of the Utøya terrorist  
20  
21 attack (54.6% of all survivors 13-33 years, n=482).

22  
23 **Main outcome measures:** We report primary and specialized somatic and mental healthcare service  
24  
25 consumption in the early (0 to 6 months) and delayed (>6 to 36 months) aftermath of the attack,  
26  
27 both in terms of frequency of services consumed (assessed by age-adjusted negative binomial hurdle  
28  
29 regression) and proportions of mothers and fathers provided for (mean semiannual values). The pre-  
30  
31 and post-disaster rates were compared by rate ratios (RR) and 95% confidence intervals (CI) were  
32  
33 generated through bootstrap replications.

34  
35 **Results:** Frequency of primary healthcare service consumption increased significantly in both  
36  
37 mothers and fathers in the early aftermath of the attack (mothers RR=1.97, 95% CI 1.76 to 2.23;  
38  
39 fathers RR=1.73, 95% CI 1.36 to 2.29), and remained significantly elevated throughout the delayed  
40  
41 aftermath. In the specialized mental healthcare services, a significant increase in the frequency of  
42  
43 service consumption was observed in mothers only (early RR=7.00, 95% CI 3.86 to 19.02; delayed  
44  
45 RR=3.20, 95% CI 1.49 to 9.49). In specialized somatic healthcare, no significant change was found.

46  
47 **Conclusion:** Following terrorist attacks, healthcare providers must prepare for increased healthcare  
48  
49 needs not only in survivors, but also their close family members, such as parents. Needs may present  
50  
51 shortly after the attack and require long-term follow-up.  
52  
53  
54  
55  
56  
57  
58  
59  
60

**"STRENGTH AND LIMITATIONS" BOX**

- Objective measure on healthcare consumption pre- and post-disaster in a universal, public, accessible and well-developed healthcare system.
- High number of both mother and father participants. Nonetheless, the full size of the parent population remains unknown.
- Only services provided by healthcare professionals were included. Psychosocial support from other professionals was not included.

**KEYWORDS**

Disaster

Terrorism

Indirect exposure

PTSD, Anxiety and Depression

Parents

Health services

Primary Healthcare

Specialized Healthcare

Mental Healthcare

Hurdle regression analyses

***Geolocation information:*** Utøya (60°01'25.0"N 10°14'50.0"E)



## INTRODUCTION

Life threat to a child may jeopardize parents' long-term health. DSM-5 (1) currently recognizes learning that a close family member is being threatened with death or serious injury as being a potentially traumatizing event. In recent years, numerous terrorist attacks have targeted children, adolescents and young adults who are not with their parents, either at school or during their leisure time (e.g. summer camp, night club, café, concert hall (2-7)). Despite widespread concern about the post-disaster health of survivors, their parents' post-disaster reactions, coping and needs have received little attention.

The impact of life threat to a child on parental health has previously been addressed in studies of seriously ill children. Elevated levels of parental anxiety, depression and post-traumatic stress reactions have been reported following acute (8, 9) and chronic disease (10, 11), as well as traffic accidents involving children (12, 13). Similarly, in parents of sexually abused children (14, 15) and in parents of young soldiers deployed to hostile environments (16, 17), high levels of emotional distress have been shown to persist for years. Several population-based studies have addressed the impact of trauma on individuals physically distant from the site of a terrorist disaster (18-23). Nonetheless, only one study has specifically addressed the distress of parents who witnessed or learned of a terrorist attack that threatened the lives of their own children (2). This small study (n=20 mothers) reported parental distress at levels comparable to those of the young survivors themselves. Additionally, traumatization may potentially induce somatic health complaints, including respiratory, gastrointestinal and cardiovascular disease (24-26). A registry-based study of parents who learned that their adolescent and young adult children were caught in a pub fire in the Netherlands in 2001, reported that the post-disaster incidence of cardiovascular health problems, as recorded by the primary healthcare provider, was significantly higher in parents of burnt survivors than in unaffected community controls (27). Thus, although limited, current evidence suggests that terrorism may potentially elicit both mental and somatic healthcare needs in parents of survivors.

1  
2  
3 Our previous studies of the mothers and fathers of the Utøya survivors demonstrated  
4  
5 substantial and lasting levels of emotional distress among the participants (28, 29). The current study  
6  
7 uses national registry-based healthcare data to assess the parents' primary and specialized  
8  
9 healthcare consumption before and after the terrorist attack. Separately in mothers and fathers, we  
10  
11 investigated whether the frequency of parents' primary and specialized healthcare service  
12  
13 consumption in the early (0-6 months) and delayed (>6-36 months) aftermath of the terrorist attack  
14  
15 was higher than in the three-year period before the terrorist attack. Secondly, we examined whether  
16  
17 the semiannual proportions of mothers and fathers consuming one or more healthcare services were  
18  
19 increased early and delayed, when compared to pre-disaster levels. Lastly, we assessed the reasons  
20  
21 for parents accessing healthcare services in the aftermath of the terrorist attack by mapping out the  
22  
23 reasons for encountering the primary healthcare services, the entry point to the healthcare system in  
24  
25 Norway, as recorded by their primary healthcare providers.  
26  
27  
28  
29  
30  
31

## 32 METHOD

### 33 Setting

34 The setting of this study is the aftermath of the Utøya terrorist attack.  
35  
36  
37

38 *Trauma:* On July-22-2011, two terrorist attacks shook Norway. A single perpetrator  
39  
40 detonated a bomb in the government quarter in Oslo, before setting out on a shooting spree at the  
41  
42 youth summer camp on Utøya Island less than two hours later. The youth were trapped on the small  
43  
44 island with the perpetrator for more than one hour. The attack left 69 dead and 495 alive, of whom  
45  
46 35 had sustained severe physical injuries (30). The parents, all physically distant from the island,  
47  
48 watched events unfold via live media reports and some had access to intermittent  
49  
50 telecommunication with their offspring on the island. Following the attack, the survivors were  
51  
52 reunited with their families throughout the country.  
53  
54

55 *Post-trauma care:* Soon after the terrorist attack, an early proactive outreach program was  
56  
57 established, in line with the current trauma-informed consensus of expert opinions (31). Multi-  
58  
59  
60

1  
2  
3 disciplinary crisis teams, established in affected municipalities (n=128), were to provide the  
4  
5 immediate psychosocial support to those in need; dedicated contact persons were to proactively  
6  
7 monitor and support the affected families throughout the first year post-disaster, and to facilitate  
8  
9 access to regular healthcare services as required (28, 32). Post-disaster healthcare services were  
10  
11 provided by the regular two-level healthcare system in Norway (33). Level one, including the primary  
12  
13 healthcare services of general practitioners (GPs) and emergency primary healthcare, provides  
14  
15 services for both somatic and mental health complaints and acts as the entry point and gatekeeper  
16  
17 to secondary healthcare services. Level two, the secondary healthcare services, provides specialized  
18  
19 mental and specialized somatic healthcare services and is accessed through medical referrals only.  
20  
21 Regular healthcare services in Norway are publicly funded and accessible throughout the country.  
22  
23  
24  
25

### 26 27 Design

28  
29 This is a longitudinal, prospective study, assessing registry-based data on parental healthcare  
30  
31 consumption in the periods three years before and after the terrorist attack (July-22-2008 to July-21-  
32  
33 2014).  
34  
35  
36

### 37 38 Procedure

39  
40 Parental recruitment and participation in the earlier waves of the larger Utøya study have been  
41  
42 explained in detail previously (28, 34). In summary, the earlier waves had open cohort designs,  
43  
44 extending invitations to all eligible participants (parents of survivors 13-33 years, n=482). The third  
45  
46 wave of the study, on which this paper reports, had a closed cohort design, meaning that only  
47  
48 parents who had participated in either of the previous waves (n=532) were invited. Invitations were  
49  
50 distributed by mail and included information on how to opt out. By mid-July of 2014, three years  
51  
52 after the attack, 95% of participants had consented to participation in writing. The Regional  
53  
54 Committees for Medical and Health Research Ethics in Norway approved the study.  
55  
56  
57  
58  
59  
60

### Sample

In the overall study, 299 mothers and 233 fathers (n=532 parents) participated in at least one of the three waves; 75.5% of the mothers (n=226) and 60.5% of the fathers (n=141) took part in Wave 3, on which this paper reports. The participants represented 251 distinct families and cared for a total of 263 survivors (54.6% of all Utøya survivors aged 13 to 33 years). Mean ages of mothers and fathers at the time of the attack were 46.7 (SD 5.8) and 49.7 (SD 5.9) years, respectively. A majority of the parents were of Norwegian origin (n=335, 92.0%, missing n=3), held a university or a university college degree (n=225, 61.3%), had an average or above average financial situation (n=297, 80.9%), and were, at the time of data collection, mostly employed (n=314, 86.3%, missing n=3). Attrition from previous waves (n=165, 31.0%) favored male gender (OR 2.02,  $\chi^2 p < 0.001$ ). Neither non-Norwegian origin (OR-mothers=1.00,  $\chi^2 p = 0.996$ , OR-fathers=1.15,  $\chi^2 p = 0.805$ ) nor levels of early post-traumatic stress reactions (mean-mothers 1.34 vs 1.34, t-test p=0.967, mean-fathers 0.80 vs 0.88, t-test p=0.358) were associated with non-participation at Wave 3. Most participants consented to collection of registry-based data (mothers n=222, 98.5% and fathers n=136, 96.5%).

### Measures

*Primary healthcare consumption* was assessed through the Health Economics Administration (HELFO) database by analyzing reimbursement claims filed by primary healthcare providers, GPs, to the national insurance scheme. All records dating from July-22-2008 to July-21-2014 were included, regardless of whether they referred to services provided at a GP clinic, during house calls, by telephone or mail, provided by regular GPs or locum GPs, within regular office hours or when on-call. A total of 13,419 records were identified, of which 42 (0.3%) were duplicates (matching date, time, diagnosis, provider and mode of contact). The non-duplicates (n=13,377) were subdivided according to the type and time of service (Supplementary table 1). Reason for encountering was recorded according to International Classification of Primary Care (ICPC-2) (35) and clustered according to type of health problem (36).

1  
2  
3           *Specialized healthcare consumption* was assessed using the Norwegian Patient Registry (NPR)  
4  
5 – activity reported by hospitals and hospital clinics – and the Health Economics Administration  
6  
7 Database (HELFO) – reimbursement claims filed to the National Insurance Scheme by private  
8  
9 specialized healthcare providers. All services recorded by physicians and psychologists dating from  
10  
11 July-22-2008 to July-21-2014 were included, irrespective of whether the service was provided in a  
12  
13 public hospital, a private clinic, by telephone or mail and within regular office hours or not. A total of  
14  
15 6,024 specialized healthcare services were identified (HELFO database n=1,872, NPR n=4,152  
16  
17 services), of which 193 (3.2%) were duplicates (matching date, diagnosis, healthcare provider and  
18  
19 mode of contact). The services were subdivided into specialized mental healthcare services (n=2,079)  
20  
21 and specialized somatic healthcare services (n=3,752) and, further, according to type and time of  
22  
23 service (Supplementary table 1).  
24  
25

26           *Quality of data.* Claims to the national insurance scheme (HELFO) are submitted  
27  
28 electronically. All claims with missing patient IDs are automatically rejected and returned to the  
29  
30 healthcare provider for resubmission. Thus, the HELFO database contains no data with missing  
31  
32 patient ID. In contrast, NPR does not reject incomplete information, and consequently contains a  
33  
34 small number of entries with missing patient ID (Supplementary table 2).  
35  
36  
37  
38  
39

#### 40 Statistics

41  
42 The data analyzed in this paper is count data (i.e. frequencies of occurrences within a predefined  
43  
44 time period) that were recorded in the three years before and after a terrorist attack. Mothers and  
45  
46 fathers were assessed separately throughout the paper.  
47

48           Descriptive statistics are presented graphically. The distribution of overall frequencies by  
49  
50 which healthcare services were accessed before and after the terrorist attack are presented as split  
51  
52 violin diagrams (37). Rates of healthcare service consumption across the study period and the  
53  
54 proportions of individuals accessing healthcare services semiannually are presented in a second  
55  
56 figure, by line and pie charts. As is often found in data on healthcare consumption (38), our data was  
57  
58  
59  
60

1  
2  
3 overdispersed (variance greater than the mean value) and exhibited excess zeros (individuals with no  
4 occurrences). The corresponding numerical values are tabulated in the supplementary material that  
5 mirrors the graphics included in the paper.  
6  
7  
8

9  
10 The statistical analyses included in this paper compare post-disaster by pre-disaster  
11 healthcare consumption. As the parents' age was hypothesized to influence healthcare needs  
12 independently of the terrorist attack being investigated, rates of pre- and post-disaster healthcare  
13 consumption were predicted from age-adjusted regression models, rather than assessing the  
14 observed pre- and post-disaster values directly. Negative binomial hurdle regressions were chosen  
15 for rate predictions, as this method is suitable for overdispersed count data exhibiting excess zeros  
16 (39). In order for results to be interpreted in terms of rates, the regressions need to be offset for the  
17 observational period, also known as the person-time at risk. In our material, hospital admissions were  
18 considered to make an individual unavailable for healthcare services by other healthcare providers.  
19 Thus, in our study observational periods were defined as days of non-hospitalization within each time  
20 period being investigated. Negative binomial hurdle regression is a two-component regression  
21 model (39). Thus, model predictions need to be calculated for a predefined index individual. In our  
22 study, the index parent was defined as a mother or a father of 47 years of age at the time of the  
23 attack, reflecting the median age of the full parent sample. In order to increase comparability, we  
24 chose to make predictions for the same age in both mothers and fathers, despite the fathers being  
25 slightly older than the mothers.  
26  
27  
28  
29  
30  
31  
32  
33  
34  
35  
36  
37  
38  
39  
40  
41  
42  
43

44 The detailed statistical procedure was as follows. First, predictions of frequency of healthcare  
45 service consumption were made for each period of interest, i.e. pre-disaster and the early and  
46 delayed aftermath. Second, annualized rates of healthcare service consumption were obtained by  
47 dividing the predicted frequency by the duration of the time period investigated (i.e. before=36  
48 months, early aftermath=6 months, delayed aftermath=30 months). Third, the proportion of mothers  
49 and fathers acquiring services within a six-month period was calculated by averaging observed  
50 semiannual proportions (by design, the frequency of non-zero predictions equals the observed value  
51  
52  
53  
54  
55  
56  
57  
58  
59  
60

1  
2  
3 in negative binomial hurdle regressions). Finally, post- versus pre-disaster rate ratios (RR) were  
4  
5 computed by dividing the rates of healthcare consumption (both the frequency of services  
6  
7 consumption and the proportion of individuals accessing services) in the early and delayed aftermath  
8  
9 by the corresponding pre-disaster rates. Bias-corrected and accelerated 95% confidence intervals (CI)  
10  
11 of RR were generated through bootstraps of 10,000 replications.  
12

13  
14 All analyses were made using the full dataset, which included *all services* provided by primary  
15  
16 and specialized healthcare service providers. As supplementary material, the analyses were repeated  
17  
18 on a dataset including only *in person* consultations with the healthcare provider (i.e. excluding the  
19  
20 telephone consultations, mail correspondence etc.).  
21

22  
23 Across the time period investigated, improved quality of reporting practices to NPR was  
24  
25 observed (fewer entries were recorded with missing patient IDs, Supplementary table 2). The  
26  
27 improved quality of reporting practices was most evident between 2009 and 2010. In the final year  
28  
29 pre-disaster, levels of missing patient IDs were not substantially different to post-disaster levels. As  
30  
31 incomplete entries in NPR may lead to underestimation of healthcare consumption, sensitivity  
32  
33 analyses were performed by repeating all analyses that included the three-year pre-disaster NPR  
34  
35 data, with NPR data from the final year pre-disaster only.  
36

37  
38 Analyses were performed with R-version-3.0.3 (R Foundation for Statistical Computing), with  
39  
40 the R-packages *pscl* (1.4.9) for hurdle regressions and *boot* (1.3-13) for bootstrap analyses. Violin  
41  
42 plots were generated through an adaptation of the *vioplot* (0.2) package.  
43  
44

## 45 46 RESULTS

47  
48 The overall aim of this study was to create a detailed description of pre- and post-disaster patterns of  
49  
50 parental healthcare consumption. Thus, we began by mapping out the frequency distributions by  
51  
52 which each parent accessed healthcare services in the periods three years before and after the attack  
53  
54 (Figure 1a-b). In primary healthcare, nearly all parents were found to have accessed healthcare  
55  
56 services on one or more occasion both pre- and post-disaster. In the specialized mental healthcare  
57  
58  
59  
60

1  
2  
3 services only a minority of the parents had received services. Notably, high variability in frequency of  
4  
5 acquisition was found for all services.  
6

7 Figure 2a-b descriptively outlines the trajectories of healthcare consumption over time.  
8  
9 Upper halves of figures (line charts) report the annual rates at which healthcare services were  
10  
11 provided to the parents before and after the attack. Bottom halves of figures (pie charts) report the  
12  
13 numbers and proportion of parents provided for within each six-month period. Notably, in the early  
14  
15 aftermath of the attack we observed a sharp increase in frequency of both primary and specialized  
16  
17 mental healthcare services acquired. In the delayed aftermath, the observed frequency of healthcare  
18  
19 service acquisition largely leveled out.  
20  
21

22 Figure 3a-b presents the output of the statistical analyses comparing pre- and post-disaster  
23  
24 healthcare consumption. The horizontal axes indicate the RR of post- versus pre-disaster healthcare  
25  
26 consumption. The dotted vertical line indicates no difference (RR=1). A statistically significant  
27  
28 difference is indicated when the 95% CI do not overlap this line. First, rates of healthcare *services*  
29  
30 *utilized (a)* before and after the attack were addressed. We found that age-adjusted predictions of  
31  
32 primary healthcare service consumption rates in mothers and fathers were significantly elevated  
33  
34 both in the early and delayed aftermath, when compared to the three-year period before the  
35  
36 terrorist attack. Similarly, in mothers, but not in fathers, a significant increase in rates of post-  
37  
38 disaster specialized mental healthcare service consumption was demonstrated, both in the early and  
39  
40 delayed aftermath. In fathers, specialized mental healthcare service consumption could not be  
41  
42 reliably bootstrapped, due to an insufficient number of occurrences. No significant increase in rates  
43  
44 was found in the specialized somatic healthcare services. Second, we compared the proportion of  
45  
46 *individuals utilizing the services (b)* before and after the attack. We found that, compared to pre-  
47  
48 disaster values, significantly more mothers and fathers utilized primary healthcare services, both in  
49  
50 the early and delayed aftermath. Furthermore, significantly more mothers and fathers utilized  
51  
52 specialized mental healthcare services in the early aftermath, when compared to pre-disaster levels.  
53  
54 In the delayed aftermath, the numbers of mothers, but not fathers, utilizing the specialized mental  
55  
56  
57  
58  
59  
60



1  
2  
3 healthcare services remained significantly elevated. Sensitivity analyses addressing the improved  
4 reporting practices to NPR across the study period consistently returned conclusions that were not  
5 appreciably different to the findings presented in this paper, and are not shown.  
6  
7  
8

9  
10 Finally, we assessed the reasons for parents encountering the healthcare services in the  
11 aftermath of the attack, as recorded by the primary healthcare providers at the time of the services'  
12 provision (Figure 4). Notably, psychological health complaints dominated reasons for encountering in  
13 both genders. In fact, 78.4% of mothers (n=174) and 47.1% of fathers (n=64) consulted their GP  
14 about psychological complaints (ICPC-2, chapter "P") in the aftermath of the attack. More than one  
15 third were diagnosed with depression (mothers n=42, 19.0%; fathers n=15, 11.0%), or PTSD (mothers  
16 n=14, 6.3%; fathers n=10, 7.4%) or both (mothers n=9, 4.1%; fathers n=4, 2.9%). Individuals with  
17 psychological health complaints were largely managed by primary healthcare services without  
18 receiving specialized mental healthcare services (mothers n=106, 60.9%; fathers n=47, 73.4%).  
19  
20  
21  
22  
23  
24  
25  
26  
27  
28  
29  
30

## 31 DISCUSSION

32  
33 The overall aim of this study was to make a detailed description of pre- and post-disaster healthcare  
34 consumption in parents of the Utøya terrorist attack survivors. We found that primary healthcare  
35 was the larger provider of healthcare services both before and after the terrorist attack. The number  
36 of services provided to both mothers and fathers increased soon after the terrorist attack and  
37 peaked within the first six-month period. The increase in primary healthcare services both in the  
38 early and delayed aftermath was largely attributable to psychological health complaints, as recorded  
39 by their primary healthcare provider. In Norway, primary healthcare is the entry point to specialized  
40 healthcare, as well as to social benefits and public welfare services. Our figures suggest an important  
41 role for GPs in managing parents' post-disaster distress. GPs need to be aware that high numbers of  
42 parents may turn to primary healthcare with psychological health complaint in the wake of a terrorist  
43 attack, enabling appropriate preparations.  
44  
45  
46  
47  
48  
49  
50  
51  
52  
53  
54  
55  
56  
57  
58  
59  
60

1  
2  
3 Increase in post-disaster primary healthcare consumption was most notable in female  
4 participants. Previous research has identified female survivors of trauma as more susceptible to  
5 developing post-traumatic stress disorder than men (40, 41). Thus, our data may in part reflect  
6 gender differences in post-disaster stress reactions. However, an alternative explanation is that  
7 distressed fathers may have been more reluctant than mothers to seek help for mental health  
8 complaints, as has been suggested by previous research (42, 43). Potential barriers to accessing post-  
9 disaster healthcare in men and women should be further addressed in future research.  
10  
11  
12  
13  
14  
15  
16  
17

18 A significant increase in numbers of both mothers and fathers accessing specialized mental  
19 healthcare services was found in the current study. This finding is in line with our previous work,  
20 demonstrating significant associations between the parents' post-traumatic stress reactions and  
21 their self-reported specialized healthcare consumption in the early aftermath of the terrorist attack  
22 (28). Lack of capacity or capability of the primary healthcare services in providing for traumatized  
23 patients, including lack of appropriate experience or expertise, may have contributed to early  
24 referrals to the specialized healthcare services in some patients. However, in keeping with a registry-  
25 based study of the psychiatric diagnoses assigned by Swedish specialized mental healthcare  
26 providers to survivors of the 2004 Southeast Asian Tsunami (44), the increase in specialized mental  
27 healthcare consumption is likely also to include the most severely traumatized parents – those in  
28 need of specialized mental healthcare interventions.  
29  
30  
31  
32  
33  
34  
35  
36  
37  
38  
39  
40  
41

42 In the aftermath of disaster, an increase in healthcare consumption may result from both  
43 new patients entering the healthcare system, as well as an increase in frequency of service  
44 consumption among those already in the services (45). In our study, most participants were found to  
45 utilize primary healthcare services both before and after the terrorist attack. Thus, the increased  
46 primary healthcare service consumption stemmed largely from an increase in frequency of  
47 healthcare consumption in individuals that were known to the services. In contrast, the specialized  
48 mental healthcare services faced an influx of patients that were largely new to the services. Potential  
49 differences in parents' post-disaster healthcare consumption according to disaster characteristics, e.g.  
50  
51  
52  
53  
54  
55  
56  
57  
58  
59  
60

1  
2  
3 magnitude, duration and potential for damage, whether it is a shared or a non-shared trauma of  
4  
5 parent and child, whether it is a natural or a man-made disaster, as well as the levels of post-disaster  
6  
7 psychosocial support services are still largely to be investigated.  
8  
9

### 10 11 Strengths and limitations

12  
13 The context of this study is a universal, public, accessible and well-developed healthcare system. The  
14  
15 study employs an objective measure on healthcare consumption, recorded by the healthcare  
16  
17 provider at the time of the healthcare service provision. The study allows for reliable comparison of  
18  
19 pre- and post-disaster data, with negligible levels of missing data. However, observed healthcare  
20  
21 consumption does not objectively reflect healthcare needs. Consumption may represent a  
22  
23 combination of the perception of needs of a patient deciding to seek medical advice, and the clinical  
24  
25 judgement of a provider, who for example may encourage renewed contacts, make referrals etc.  
26  
27 Although most applicable in similar clinical settings, we hold that our findings may reflect underlying  
28  
29 post-disaster distress, and thereby healthcare needs that may arise in parents anywhere in the world,  
30  
31 in the face of terror. Whether similar patterns of healthcare needs arise in parents after other types  
32  
33 of shared or non-shared traumatic exposures, such as when a child is struck by a natural disaster,  
34  
35 traffic accident or serious illness, remains to be investigated.  
36  
37  
38

39  
40 In the current study, we only included healthcare services provided by healthcare  
41  
42 professionals. Thus, parts of the proactive post-disaster outreach program were not included (28). In  
43  
44 the aftermath of a terrorist attack, many countries are likely to adopt some kind of crisis response, as  
45  
46 was reported following the major terrorist attacks in France (46) and the UK (47). The organization  
47  
48 and contents of such programs vary across different country settings (48). Psychosocial support  
49  
50 through post-disaster outreach programs may facilitate access to healthcare services and thus  
51  
52 potentially increase overall healthcare consumption. On the other hand, it may alleviate health  
53  
54 complaints, and thus reduce consumption. Following the Utøya terrorist attack, a majority of the  
55  
56 mothers and fathers were contacted by the outreach services in their municipality (28). The contents  
57  
58  
59  
60

1  
2  
3 of the services provided are not known in detail. No adjustment for engagement with the outreach  
4  
5 program was made. Finally, although uncommon due to universal coverage of the national insurance  
6  
7 scheme, some participants may have self-financed access to additional healthcare services or  
8  
9 obtained services abroad.  
10

### 11 12 13 Conclusion

14  
15 Widespread unmet healthcare needs have been reported among survivors of terrorist attacks (49).  
16  
17 Our study emphasizes the importance of thinking about survivors in a broader, more systemic way.  
18  
19 Post-disaster increase in healthcare needs may not be limited to individuals rescued from the site of  
20  
21 a terrorist attack, but may also include close family members, such as parents.  
22  
23  
24  
25  
26  
27  
28  
29  
30  
31  
32  
33  
34  
35  
36  
37  
38  
39  
40  
41  
42  
43  
44  
45  
46  
47  
48  
49  
50  
51  
52  
53  
54  
55  
56  
57  
58  
59  
60

## DECLARATIONS

### Ethics approval and consent to participate

Consents to participation and collection of registry-based data were obtained in writing from all participants. The study was approved by the Regional Committees for Medical and Health Research Ethics in Norway.

### Availability of data and material

Data supporting the findings of this study are not publicly available. The patient level, registry-based data may be accessed through the Norwegian Directorate of Health (<https://helsedirektoratet.no/english>). Restrictions apply. Technical appendix and statistical code are available from the corresponding author.

### Competing interests

All authors have completed the ICMJE uniform disclosure form at [www.icmje.org/coi\\_disclosure.pdf](http://www.icmje.org/coi_disclosure.pdf) and declare: The study was supported by the Norwegian Directorate of Health; JMH and LES have received research grants from the Norwegian Research Council; no other relationships or activities that could appear to have influenced the submitted work. All researchers worked independently from funders.

### Funding

The research was funded by grants from the Norwegian Research Council and the Norwegian Directorate of Health.

### Authorship & contributorship

JMH, ST, LES and GD conceived of the study and developed the study design with TW-L. JMH, LES and GD gathered the data. JMH and TW-L conducted the statistical analyses. JMH wrote the first draft of

1  
2  
3 the paper. All authors contributed to further drafts and approved the final submission, had full access  
4  
5 to all of the data (including statistical reports and tables) in the study and can take responsibility for  
6  
7 the integrity of the data and the accuracy of the data analysis. JM is the guarantor of the  
8  
9 manuscript being an honest, accurate, and transparent account of the study being reported; that no  
10  
11 important aspects of the study have been omitted; and that any discrepancies from the study as  
12  
13 planned (and, if relevant, registered) have been explained.  
14  
15

#### 16 17 18 Copyright, open access, and permission to reuse

19  
20 The Corresponding Author has the right to grant on behalf of all authors and does grant on behalf of  
21  
22 all authors, a worldwide licence to the Publishers and its licensees in perpetuity, in all forms, formats  
23  
24 and media (whether known now or created in the future), to i) publish, reproduce, distribute, display  
25  
26 and store the Contribution, ii) translate the Contribution into other languages, create adaptations,  
27  
28 reprints, include within collections and create summaries, extracts and/or, abstracts of the  
29  
30 Contribution, iii) create any other derivative work(s) based on the Contribution, iv) to exploit all  
31  
32 subsidiary rights in the Contribution, v) the inclusion of electronic links from the Contribution to third  
33  
34 party material where-ever it may be located; and, vi) licence any third party to do any or all of the  
35  
36 above.  
37  
38

#### 39 40 41 Acknowledgements

42  
43 The authors thank the participants of this study for their participation. The authors also thank the  
44  
45 Norwegian Directorate of Health - the Norwegian Health Economics Administration (HELFO) and the  
46  
47 Norwegian Patient Registry (NPR) for making healthcare registry data available to us.  
48  
49  
50  
51  
52  
53  
54  
55  
56  
57  
58  
59  
60

## FIGURE LEGENDS

Figure 1 a-b: Split-violin diagrams presenting frequency distributions of parents' overall healthcare service consumption before (left violins) and after (right violins) the terrorist attack. The vertical axes indicate the frequency by which the healthcare services were utilized. Each curve represents a Kernel density estimation, in which the area under curves reflect the proportion of mothers and fathers accessing the services.

Figure 2 a-b: Healthcare service consumption across time, presented as rates of services utilized (line chart) and proportions of mothers and fathers provided for within each six-month period (pie chart). Corresponding numeric values and values for *in person* consultations only are available in Supplementary table 3.

Figure 3 a-b: Rate ratios of parents' post- versus pre-disaster healthcare consumption, in terms of (a) predictions of frequency of healthcare service consumption (age-adjusted negative binomial hurdle regressions) and (b) observed proportions of individuals provided for (mean semiannual values). Confidence intervals (95%) of the ratios were generated through bootstrap replications. Corresponding numerical values are available in Supplementary table 4.

a) Ratio of estimates could not be reliably bootstrapped in our model.

Figure 4: Reasons for accessing the primary healthcare services, according to ICPC-2, in the three year periods before and after the terrorist attack. Categories with incidence of < 0.2 services per person per year are pooled ("other"). Widths of bars correspond to duration of time interval. Total number of services: 13,337. Corresponding numeric values are available in Supplementary table 5.

## References:

1. American Psychiatric Association. Diagnostic and Statistical Manual of Mental Disorders. 5th ed. Washington, DC: APA; 2013.
2. Scrimin S, Axia G, Capello F, Moscardino U, Steinberg AM, Pynoos RS. Posttraumatic reactions among injured children and their caregivers 3 months after the terrorist attack in Beslan. *Psychiatry research*. 2006;141(3):333-6.
3. Dyb G, Jensen TK, Nygaard E, Ekeberg O, Diseth TH, Wentzel-Larsen T, et al. Post-traumatic stress reactions in survivors of the 2011 massacre on Utoya Island, Norway. *The British journal of psychiatry : the journal of mental science*. 2013.
4. Suomalainen L, Haravuori H, Berg N, Kiviruusu O, Marttunen M. A controlled follow-up study of adolescents exposed to a school shooting--psychological consequences after four months. *European psychiatry : the journal of the Association of European Psychiatrists*. 2011;26(8):490-7.
5. Barron J. Nation Reels After Gunman Massacres 20 Children at School in Connecticut. *The New York Times*. 2012.
6. Paris attacks: What happened on the night. *BBC*. 2015.
7. Orlando Shooting. *The New York Times*. 2016.
8. Schmidt M, Azoulay E. Having a loved one in the ICU: the forgotten family. *Current opinion in critical care*. 2012;18(5):540-7.
9. Nelson LP, Gold JJ. Posttraumatic stress disorder in children and their parents following admission to the pediatric intensive care unit: a review. *Pediatric critical care medicine : a journal of the Society of Critical Care Medicine and the World Federation of Pediatric Intensive and Critical Care Societies*. 2012;13(3):338-47.
10. Cabizuca M, Marques-Portella C, Mendlowicz MV, Coutinho ES, Figueira I. Posttraumatic stress disorder in parents of children with chronic illnesses: a meta-analysis. *Health psychology : official journal of the Division of Health Psychology, American Psychological Association*. 2009;28(3):379-88.
11. Vanderwerker LC, Laff RE, Kadan-Lottick NS, McColl S, Prigerson HG. Psychiatric disorders and mental health service use among caregivers of advanced cancer patients. *Journal of clinical oncology : official journal of the American Society of Clinical Oncology*. 2005;23(28):6899-907.
12. Kassam-Adams N, Fleisher CL, Winston FK. Acute stress disorder and posttraumatic stress disorder in parents of injured children. *Journal of traumatic stress*. 2009;22(4):294-302.
13. Allenou C, Olliac B, Bourdet-Loubere S, Brunet A, David AC, Claudet I, et al. Symptoms of traumatic stress in mothers of children victims of a motor vehicle accident. *Depression and anxiety*. 2010;27(7):652-7.
14. Dyb G, Holen A, Steinberg AM, Rodriguez N, Pynoos RS. Alleged sexual abuse at a day care center: impact on parents. *Child abuse & neglect*. 2003;27(8):939-50.
15. Timmons-Mitchell J, Chandler-Holtz D, Semple WE. Post-traumatic stress symptoms in mothers following children's reports of sexual abuse: an exploratory study. *The American journal of orthopsychiatry*. 1996;66(3):463-7.
16. Dirkzwager AJ, Bramsen I, Ader H, van der Ploeg HM. Secondary traumatization in partners and parents of Dutch peacekeeping soldiers. *Journal of family psychology : JFP : journal of the Division of Family Psychology of the American Psychological Association (Division 43)*. 2005;19(2):217-26.
17. Slaven-Lee PW, Padden D, Andrews CM, Fitzpatrick JJ. Emotional distress and health risk behaviours of mothers of United States Marines. *International nursing review*. 2011;58(2):164-70.
18. Schuster MA, Stein BD, Jaycox L, Collins RL, Marshall GN, Elliott MN, et al. A national survey of stress reactions after the September 11, 2001, terrorist attacks. *The New England journal of medicine*. 2001;345(20):1507-12.



19. Rubin GJ, Brewin CR, Greenberg N, Simpson J, Wessely S. Psychological and behavioural reactions to the bombings in London on 7 July 2005: cross sectional survey of a representative sample of Londoners. *BMJ (Clinical research ed)*. 2005;331(7517):606.
20. Rubin GJ, Brewin CR, Greenberg N, Hughes JH, Simpson J, Wessely S. Enduring consequences of terrorism: 7-month follow-up survey of reactions to the bombings in London on 7 July 2005. *The British journal of psychiatry : the journal of mental science*. 2007;190:350-6.
21. Thoresen S, Aakvaag HF, Wentzel-Larsen T, Dyb G, Hjemdal OK. The day Norway cried: Proximity and distress in Norwegian citizens following the 22nd July 2011 terrorist attacks in Oslo and on Utoya Island. *European journal of psychotraumatology*. 2012;3.
22. Miguel-Tobal JJ, Cano-Vindel A, Gonzalez-Ordi H, Iruarrizaga I, Rudenstine S, Vlahov D, et al. PTSD and depression after the Madrid March 11 train bombings. *Journal of traumatic stress*. 2006;19(1):69-80.
23. Gabriel R, Ferrando L, Corton ES, Mingote C, Garcia-Camba E, Liria AF, et al. Psychopathological consequences after a terrorist attack: an epidemiological study among victims, the general population, and police officers. *European psychiatry : the journal of the Association of European Psychiatrists*. 2007;22(6):339-46.
24. Schnurr PP, Green, B. L., & Kaltman, S. . *Trauma exposure and physical health*. . New York: The Guilford Press; 2007.
25. Boscarino JA. Posttraumatic stress disorder and physical illness: results from clinical and epidemiologic studies. *Annals of the New York Academy of Sciences*. 2004;1032:141-53.
26. Pacella ML, Hruska B, Delahanty DL. The physical health consequences of PTSD and PTSD symptoms: a meta-analytic review. *Journal of anxiety disorders*. 2013;27(1):33-46.
27. Dorn T, Yzermans JC, Spreeuwenberg PM, van der Zee J. Physical and mental health problems in parents of adolescents with burns--a controlled, longitudinal study. *Journal of psychosomatic research*. 2007;63(4):381-9.
28. Haga JM, Stene LE, Wentzel-Larsen T, Thoresen S, Dyb G. Early postdisaster health outreach to modern families: a cross-sectional study. *BMJ open*. 2015;5(12):e009402.
29. Thoresen S, Jensen TK, Wentzel-Larsen T, Dyb G. Parents of terror victims. A longitudinal study of parental mental health following the 2011 terrorist attack on Utoya Island. *Journal of anxiety disorders*. 2016;38:47-54.
30. Bugge I, Dyb G, Stensland SO, Ekeberg O, Wentzel-Larsen T, Diseth TH. Physical injury and posttraumatic stress reactions. A study of the survivors of the 2011 shooting massacre on Utoya Island, Norway. *Journal of psychosomatic research*. 2015;79(5):384-90.
31. Bisson JI, Tavakoly B, Witteveen AB, Ajdukovic D, Jehel L, Johansen VJ, et al. TENTS guidelines: development of post-disaster psychosocial care guidelines through a Delphi process. *The British journal of psychiatry : the journal of mental science*. 2010;196(1):69-74.
32. Dyb G, Jensen T, Glad KA, Nygaard E, Thoresen S. Early outreach to survivors of the shootings in Norway on the 22nd of July 2011. *European journal of psychotraumatology*. 2014;5.
33. Ringard A, Sagan A, Sperre Saunes I, Lindahl AK. Norway: health system review. *Health systems in transition*. 2013;15(8):1-162.
34. Stene LE, Dyb G. Research participation after terrorism: an open cohort study of survivors and parents after the 2011 Utoya attack in Norway. *BMC research notes*. 2016;9:57.
35. World Organization of Family Doctors (Wonca). *ICPC-2-R. International Classification of Primary Care. Revised Second Edition*. Oxford: Oxford University Press 2005.
36. Britt H, Angelis M, Harris E. The reliability and validity of doctor-recorded morbidity data in active data collection systems. *Scandinavian journal of primary health care*. 1998;16(1):50-5.
37. Hintze JL, Nelson RD. Violin Plots: A Box Plot-Density Trace Synergism. *The American Statistician*. 1998;52(2):181-4.
38. Elhai JD, Calhoun PS, Ford JD. Statistical procedures for analyzing mental health services data. *Psychiatry research*. 2008;160(2):129-36.
39. Zeileis A KC, Jackman S. Regression models for count data in R. *J Stat Softw* 2008;27:1-25.

- 1  
2  
3 40. Olff M, Langeland W, Draijer N, Gersons BP. Gender differences in posttraumatic stress  
4 disorder. *Psychological bulletin*. 2007;133(2):183-204.
- 5 41. Tolin DF, Foa EB. Sex differences in trauma and posttraumatic stress disorder: a quantitative  
6 review of 25 years of research. *Psychological bulletin*. 2006;132(6):959-92.
- 7 42. Addis ME, Mahalik JR. Men, masculinity, and the contexts of help seeking. *The American*  
8 *psychologist*. 2003;58(1):5-14.
- 9 43. Oliver MI, Pearson N, Coe N, Gunnell D. Help-seeking behaviour in men and women with  
10 common mental health problems: cross-sectional study. *The British journal of psychiatry : the journal*  
11 *of mental science*. 2005;186:297-301.
- 12 44. Arnberg FK, Gudmundsdottir R, Butwicka A, Fang F, Lichtenstein P, Hultman CM, et al.  
13 *Psychiatric disorders and suicide attempts in Swedish survivors of the 2004 southeast Asia tsunami: a*  
14 *5 year matched cohort study*. *The lancet Psychiatry*. 2015;2(9):817-24.
- 15 45. Rosendal S, Mortensen EL, Andersen HS, Heir T. Use of health care services before and after a  
16 natural disaster among survivors with and without PTSD. *Psychiatric services (Washington, DC)*.  
17 2014;65(1):91-7.
- 18 46. Vandentorren S, Paty AC, Baffert E, Chansard P, Caserio-Schonemann C. Syndromic  
19 surveillance during the Paris terrorist attacks. *Lancet*. 2016;387(10021):846-7.
- 20 47. Brewin CR, Scragg P, Robertson M, Thompson M, d'Ardenne P, Ehlers A. Promoting mental  
21 health following the London bombings: a screen and treat approach. *Journal of traumatic stress*.  
22 2008;21(1):3-8.
- 23 48. Duckers MLA, Witteveen AB, Bisson JI, Olff M. The Association Between Disaster Vulnerability  
24 and Post-disaster Psychosocial Service Delivery Across Europe. *Administration and policy in mental*  
25 *health*. 2017;44(4):470-9.
- 26 49. Brewin CR, Fuchkan N, Huntley Z, Robertson M, Thompson M, Scragg P, et al. Outreach and  
27 screening following the 2005 London bombings: usage and outcomes. *Psychological medicine*.  
28 2010;40(12):2049-57.
- 29  
30  
31  
32  
33  
34  
35  
36  
37  
38  
39  
40  
41  
42  
43  
44  
45  
46  
47  
48  
49  
50  
51  
52  
53  
54  
55  
56  
57  
58  
59  
60

**a) mothers (n=222)**

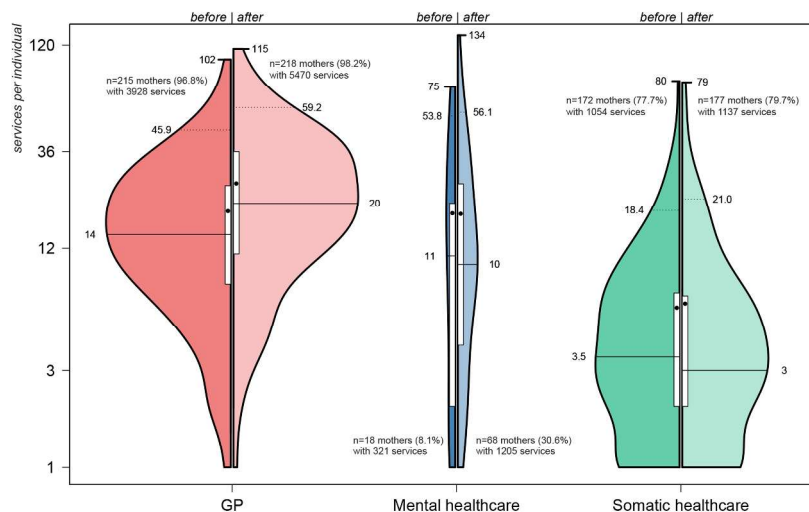

**b) fathers (n=136)**

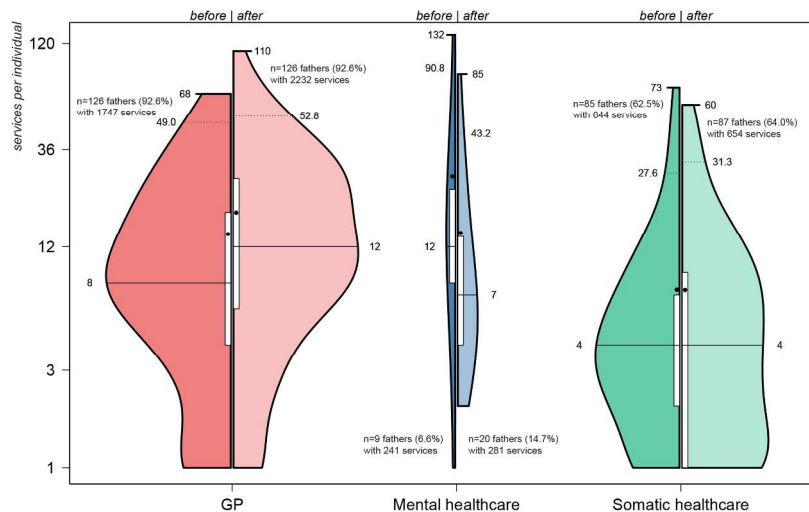

Colored areas/violins: Kernel density estimations, multiplied by proportion of mothers and fathers having utilized services pre- and post-disaster (left and right violin, respectively). White vertical box: inter quartile range (Q1-Q3). Solid horizontal line: median value. Black bullet: mean value. Dotted horizontal line: 95th percentile. Upper edge: maximum value.

Figure 1 a-b: Split-violin diagrams presenting frequency distributions of parents' overall healthcare service consumption before (left violins) and after (right violins) the terrorist attack. The vertical axes indicate the frequency by which the healthcare services were utilized. Each curve represents a Kernel density estimation, in which the area under curves reflect the proportion of mothers and fathers accessing the services.

186x264mm (300 x 300 DPI)

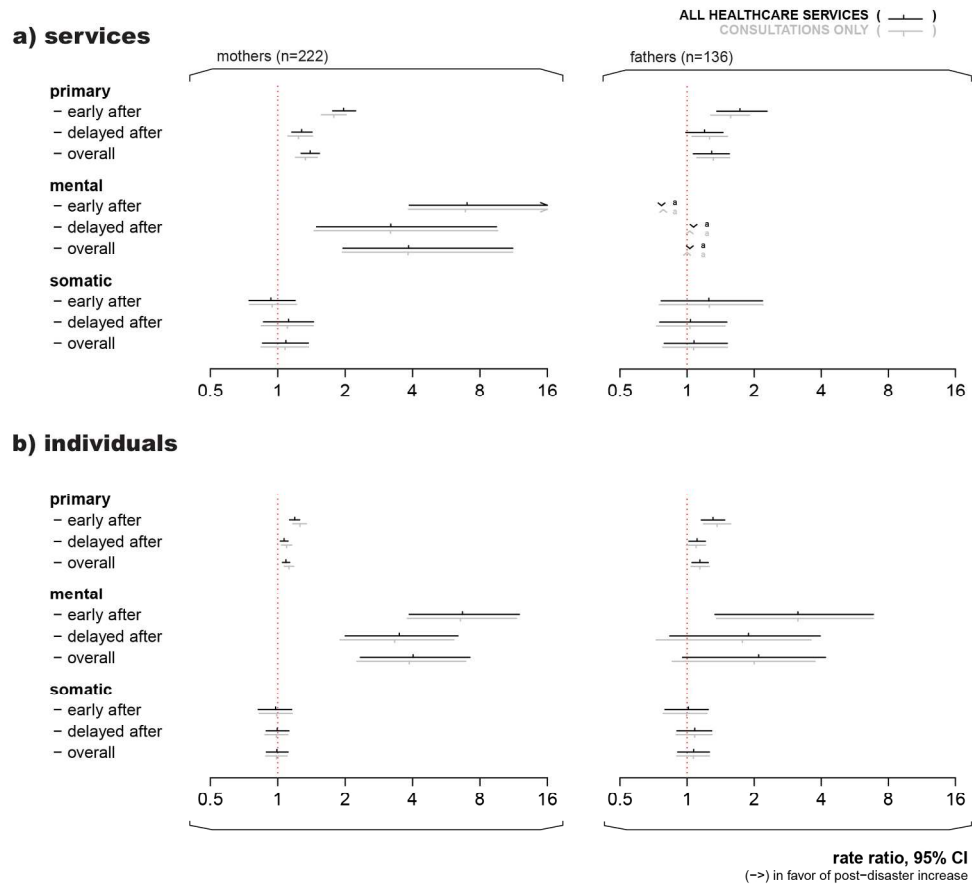

Figure 3 a-b: Rate ratios of parents' post- versus pre-disaster healthcare consumption, in terms of (a) predictions of frequency of healthcare service consumption (age-adjusted negative binomial hurdle regressions) and (b) observed proportions of individuals provided for (mean semiannual values). Confidence intervals (95%) of the ratios were generated through bootstrap replications. Corresponding numerical values are available in Supplementary table 4. † a) Ratio of estimates could not be reliably bootstrapped in our model.

186x166mm (300 x 300 DPI)

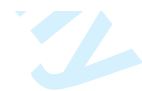

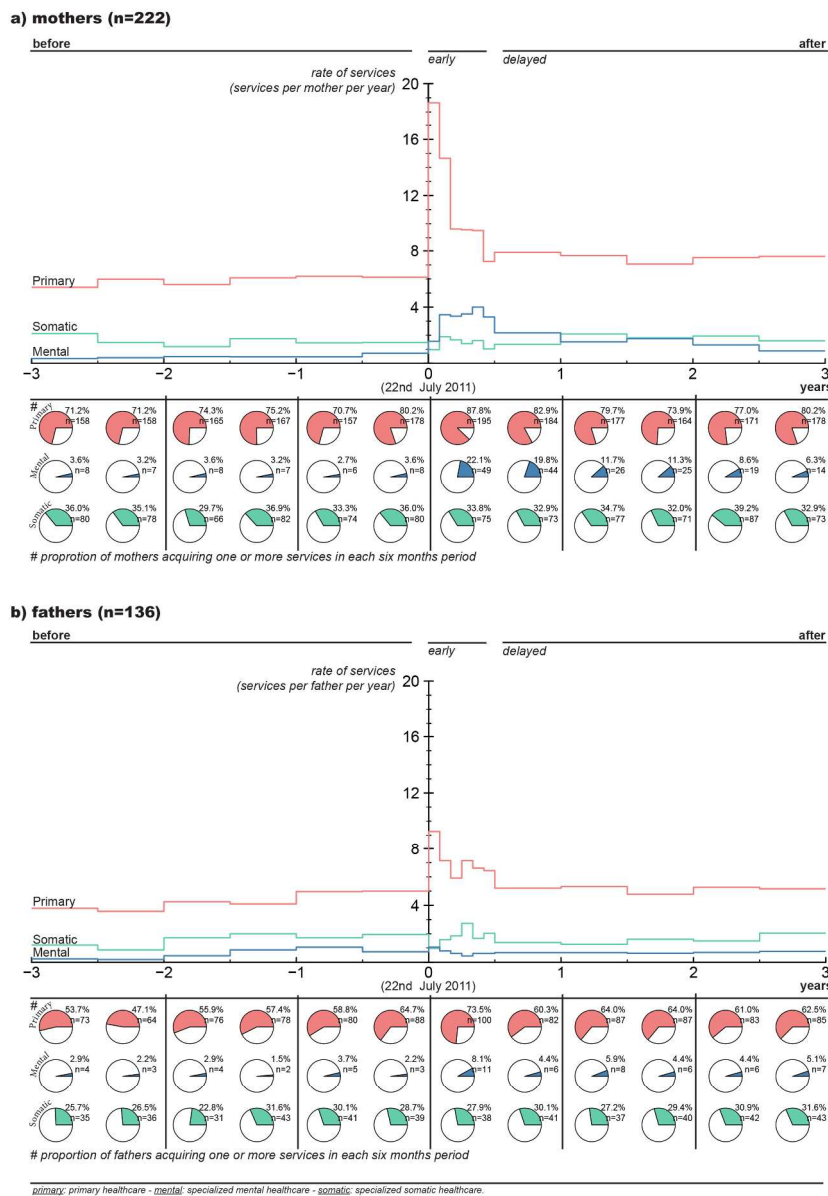

Figure 2 a-b: Healthcare service consumption across time, presented as rates of services utilized (line chart) and proportions of mothers and fathers provided for within each six-month period (pie chart). Corresponding numeric values and values for in person consultations only are available in Supplementary table 3.

194x273mm (300 x 300 DPI)

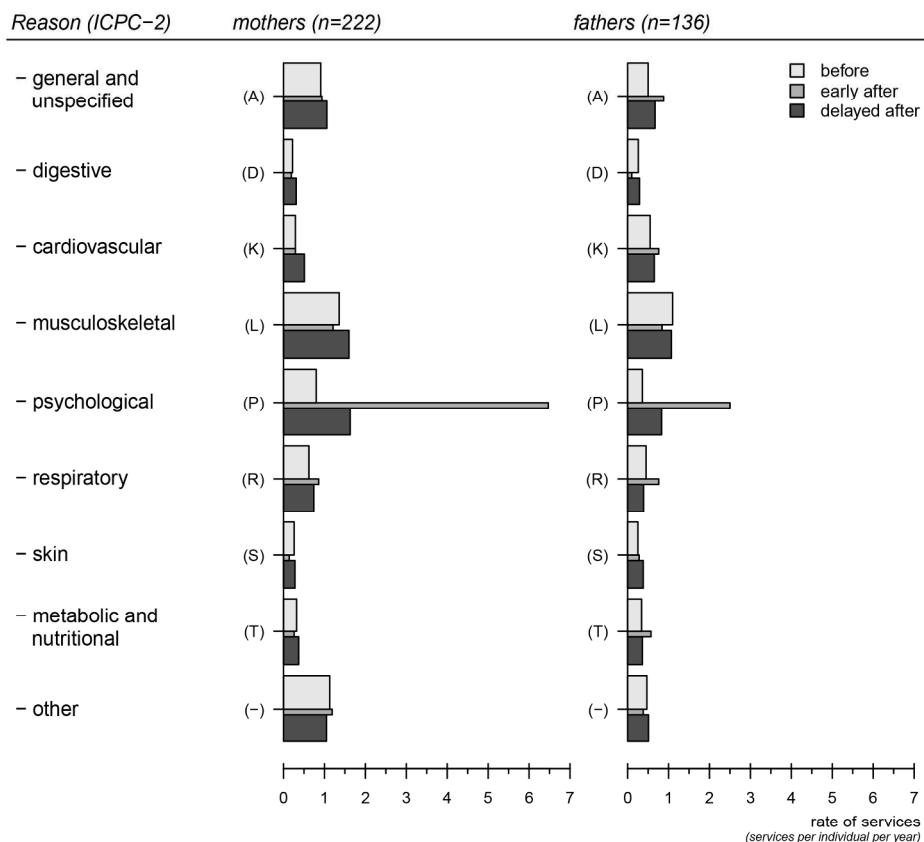

Figure 4: Reasons for accessing the primary healthcare services, according to ICPC-2, in the three year periods before and after the terrorist attack. Categories with incidence of < 0.2 services per person per year are pooled ("other"). Widths of bars correspond to duration of time interval. Total number of services: 13,337. Corresponding numeric values are available in Supplementary table 5.

199x185mm (300 x 300 DPI)

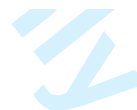

**Supplementary table 1** – Nature of the different healthcare services provided to the study participants in the three year periods before and after the Utøya attack (total number of services: 19,208).

|                                         | Primary healthcare  |                    | Specialized mental healthcare |                    | Specialized somatic healthcare |                    |
|-----------------------------------------|---------------------|--------------------|-------------------------------|--------------------|--------------------------------|--------------------|
|                                         | before<br>(n=5,675) | after<br>(n=7,702) | before<br>(n=578)             | after<br>(n=1,501) | before<br>(n=1,836)            | after<br>(n=1,916) |
| outpatient, consultations               | 3130 (55.2)         | 4082 (53.0)        | 531 (91.9)                    | 1374 (91.5)        | 1631 (88.8)                    | 1694 (88.4)        |
| outpatient, other services <sup>a</sup> | 2545 (44.8)         | 3620 (47.0)        | 31 (5.4)                      | 112 (7.5)          | 67 (3.6)                       | 97 (5.1)           |
| inpatient, admissions <sup>b</sup>      | -                   | -                  | 16 (2.8)                      | 15 (1.0)           | 138 (7.5)                      | 125 (6.5)          |

<sup>a</sup> telephone consultations, mail correspondence etc.

<sup>b</sup> mean duration of admissions, pre- and post-disaster - specialized mental healthcare – 10.7 days (SD 9.2) and 15.1 days (SD 17.2) - specialized somatic healthcare - 5.4 days (SD 7.6) and 4.60 days (SD 6.9).

**Supplementary table 2** – Incomplete entries (missing patient ID) in the Norwegian Patient Registry<sup>1</sup>

a) Specialized mental healthcare services

| year | missing ID (%) |
|------|----------------|
| 2008 | 5.80 %         |
| 2009 | 4.79 %         |
| 2010 | 0.78 %         |
| 2011 | 0.49 %         |
| 2012 | 0.53 %         |
| 2013 | 0.30 %         |
| 2014 | 0.25 %         |

b) Specialized somatic healthcare services

| year | missing ID (%) |
|------|----------------|
| 2008 | 4.89 %         |
| 2009 | 3.31 %         |
| 2010 | 2.19 %         |
| 2011 | 2.18 %         |
| 2012 | 1.66 %         |
| 2013 | 1.32 %         |
| 2014 | 1.22 %         |

<sup>1</sup> Source: the Norwegian Patient Registry.

**Supplementary table 3** – Observed rates of healthcare service consumption in the three-year periods before and after the terrorist attack, annualized values. Supplement to Figure 2.

|                                                    | mothers (n=222) |             |             | Fathers (n=136) |             |             |
|----------------------------------------------------|-----------------|-------------|-------------|-----------------|-------------|-------------|
|                                                    | primary         | mental      | somatic     | primary         | mental      | somatic     |
| <b>Before</b> (all services   consultations only)  |                 |             |             |                 |             |             |
| 2008-Jul-22 to 2009-Jan-21                         | 5.41   3.33     | 0.34   0.34 | 2.12   2.05 | 3.79   2.24     | 0.24   0.22 | 1.21   1.16 |
| 2009-Jan-22 to 2009-Jul-21                         | 5.98   3.05     | 0.41   0.39 | 1.49   1.46 | 3.57   1.93     | 0.19   0.19 | 0.87   0.72 |
| 2009-Jul-22 to 2010-Jan-21                         | 5.60   3.13     | 0.49   0.48 | 1.19   1.17 | 4.25   2.35     | 0.46   0.34 | 1.72   1.69 |
| 2010-Jan-22 to 2010-Jul-21                         | 6.08   3.14     | 0.47   0.44 | 1.76   1.64 | 4.10   2.46     | 0.87   0.87 | 2.00   1.97 |
| 2010-Jul-22 to 2011-Jan-21                         | 6.19   3.35     | 0.47   0.43 | 1.46   1.38 | 4.97   2.91     | 1.06   1.04 | 1.72   1.66 |
| 2011-Jan-22 to 2011-Jul-21                         | 6.13   3.17     | 0.72   0.64 | 1.49   1.40 | 5.00   2.85     | 0.74   0.71 | 1.96   1.94 |
| <b>After</b> (all services   consultations only)   |                 |             |             |                 |             |             |
| <i>early aftermath</i>                             |                 |             |             |                 |             |             |
| 2011-Jul-22 to 2011-Aug-21                         | 18.65   7.62    | 1.57   1.35 | 0.97   0.97 | 9.26   4.59     | 1.06   0.97 | 0.97   0.97 |
| 2011-Aug-22 to 2011-Sep-21                         | 14.65   7.57    | 3.46   3.03 | 1.89   1.84 | 7.15   3.88     | 0.79   0.79 | 1.59   1.50 |
| 2011-Sep-22 to 2011-Oct-21                         | 9.62   4.92     | 3.35   3.19 | 1.68   1.62 | 5.91   3.09     | 0.62   0.62 | 1.85   1.85 |
| 2011-Oct-22 to 2011-Nov-21                         | 9.57   5.19     | 3.51   3.30 | 1.41   1.41 | 7.15   3.88     | 0.44   0.44 | 2.74   2.74 |
| 2011-Nov-22 to 2011-Dec-21                         | 9.51   5.03     | 4.00   3.78 | 1.62   1.62 | 6.62   3.26     | 0.62   0.62 | 1.68   1.68 |
| 2011-Dec-22 to 2012-Jan-21                         | 7.24   3.68     | 3.30   2.97 | 1.03   0.86 | 6.44   3.79     | 0.62   0.62 | 2.03   1.85 |
| <i>delayed aftermath</i>                           |                 |             |             |                 |             |             |
| 2012-Jan-22 to 2012-Jul-21                         | 7.89   3.86     | 2.17   1.95 | 1.35   1.32 | 5.21   3.00     | 0.68   0.63 | 1.38   1.29 |
| 2012-Jul-22 to 2013-Jan-21                         | 7.67   4.25     | 1.53   1.43 | 2.09   2.01 | 5.32   3.31     | 0.68   0.63 | 1.26   1.22 |
| 2013-Jan-22 to 2013-Jul-21                         | 7.05   3.64     | 1.76   1.68 | 1.82   1.71 | 4.78   2.72     | 0.63   0.53 | 1.62   1.51 |
| 2013-Jul-22 to 2014-Jan-21                         | 7.52   4.10     | 1.32   1.24 | 1.95   1.86 | 5.26   3.04     | 0.69   0.59 | 1.50   1.38 |
| 2014-Jan-22 to 2014-Jul-21                         | 7.60   3.80     | 0.88   0.83 | 1.6   1.43  | 5.16   2.87     | 0.76   0.71 | 2.04   1.87 |
| <b>Summary</b> (all services   consultations only) |                 |             |             |                 |             |             |
| Average before                                     | 5.90   3.20     | 0.48   0.45 | 1.58   1.52 | 4.28   2.46     | 0.59   0.56 | 1.58   1.52 |
| Average after                                      | 8.21   4.22     | 1.81   1.68 | 1.71   1.62 | 5.47   3.12     | 0.69   0.63 | 1.60   1.51 |

primary: primary healthcare, mental: specialized mental healthcare, somatic: specialized somatic healthcare



**Supplementary table 4** – Rate ratios of parents’ post- versus pre-disaster healthcare consumption, in terms of (a) predictions of frequency of healthcare service consumption (age-adjusted negative binomial hurdle regression) and (b) proportions of individuals provided for (mean semiannual values). Confidence intervals (95%) of the rate ratios were generated through bootstrap replications. Supplement to Figure 3.

|                       |               | mothers (n=222) |                              |                    |                              | fathers (n=136) |                              |                    |                              |
|-----------------------|---------------|-----------------|------------------------------|--------------------|------------------------------|-----------------|------------------------------|--------------------|------------------------------|
|                       |               | all services    |                              | consultations only |                              | all services    |                              | consultations only |                              |
|                       |               | estimate        | ratio, after/before (95% CI) | estimate           | ratio, after/before (95% CI) | estimate        | ratio, after/before (95% CI) | estimate           | ratio, after/before (95% CI) |
| <b>a) services</b>    |               |                 |                              |                    |                              |                 |                              |                    |                              |
| primary               | <i>before</i> | 5.92            |                              | 3.21               |                              | 0.71            |                              | 0.66               |                              |
|                       | after - early | 11.65           | 1.97 (1.76 - 2.23)           | 5.71               | 1.78 (1.57 - 2.02)           | 0.54            | 1.73 (1.36 - 2.29)           | 0.52               | 1.57 (1.28 - 1.91)           |
|                       | - delayed     | 7.57            | 1.28 (1.15 - 1.42)           | 3.97               | 1.24 (1.11 - 1.43)           | 0.76            | 1.20 (0.99 - 1.45)           | 0.68               | 1.26 (1.05 - 1.52)           |
|                       | - overall     | 8.26            | 1.40 (1.27 - 1.54)           | 4.26               | 1.33 (1.20 - 1.50)           | 0.73            | 1.29 (1.07 - 1.55)           | 0.66               | 1.31 (1.10 - 1.55)           |
| mental                | <i>before</i> | 0.46            |                              | 0.43               |                              | 0.71            |                              | 0.66               |                              |
|                       | after - early | 3.25            | 7.00 (3.86 - 19.02)          | 2.98               | 6.88 (3.84 - 18.95)          | 0.54            | 0.77 <sup>a</sup>            | 0.52               | 0.78 <sup>a</sup>            |
|                       | - delayed     | 1.48            | 3.20 (1.49 - 9.49)           | 1.38               | 3.19 (1.45 - 9.60)           | 0.76            | 1.07 <sup>a</sup>            | 0.68               | 1.03 <sup>a</sup>            |
|                       | - overall     | 1.78            | 3.84 (1.95 - 11.21)          | 1.65               | 3.82 (1.94 - 11.18)          | 0.73            | 1.03 <sup>a</sup>            | 0.66               | 1.00 <sup>a</sup>            |
| somatic               | <i>before</i> | 1.58            |                              | 1.52               |                              | 1.31            |                              | 1.26               |                              |
|                       | after - early | 1.48            | 0.93 (0.74 - 1.20)           | 1.43               | 0.94 (0.75 - 1.21)           | 1.64            | 1.25 (0.77 - 2.18)           | 1.59               | 1.26 (0.75 - 2.19)           |
|                       | - delayed     | 1.77            | 1.12 (0.86 - 1.44)           | 1.67               | 1.10 (0.84 - 1.44)           | 1.36            | 1.04 (0.75 - 1.51)           | 1.30               | 1.03 (0.73 - 1.48)           |
|                       | - overall     | 1.72            | 1.09 (0.85 - 1.37)           | 1.63               | 1.08 (0.84 - 1.37)           | 1.41            | 1.07 (0.79 - 1.52)           | 1.35               | 1.07 (0.78 - 1.52)           |
| <b>b) individuals</b> |               |                 |                              |                    |                              |                 |                              |                    |                              |
| primary               | <i>before</i> | 0.74            |                              | 0.63               |                              | 0.56            |                              | 0.49               |                              |
|                       | after - early | 0.88            | 1.19 (1.13 - 1.25)           | 0.79               | 1.26 (1.17 - 1.34)           | 0.74            | 1.31 (1.16 - 1.48)           | 0.66               | 1.36 (1.18 - 1.57)           |
|                       | - delayed     | 0.79            | 1.07 (1.03 - 1.11)           | 0.69               | 1.10 (1.04 - 1.16)           | 0.62            | 1.11 (1.02 - 1.21)           | 0.53               | 1.10 (0.99 - 1.21)           |
|                       | - overall     | 0.80            | 1.09 (1.05 - 1.13)           | 0.70               | 1.12 (1.07 - 1.18)           | 0.64            | 1.14 (1.05 - 1.24)           | 0.55               | 1.14 (1.04 - 1.26)           |
| mental                | <i>before</i> | 0.03            |                              | 0.03               |                              | 0.03            |                              | 0.03               |                              |
|                       | after - early | 0.22            | 6.68 (3.86 - 12.00)          | 0.22               | 6.55 (3.78 - 11.65)          | 0.08            | 3.14 (1.33 - 6.86)           | 0.08               | 3.14 (1.35 - 6.86)           |
|                       | - delayed     | 0.12            | 3.49 (2.00 - 6.38)           | 0.11               | 3.33 (1.90 - 6.12)           | 0.05            | 1.89 (0.84 - 3.96)           | 0.05               | 1.77 (0.73 - 3.60)           |
|                       | - overall     | 0.13            | 4.02 (2.34 - 7.22)           | 0.13               | 3.86 (2.25 - 6.92)           | 0.05            | 2.10 (0.95 - 4.18)           | 0.05               | 2.00 (0.86 - 3.75)           |
| somatic               | <i>before</i> | 0.35            |                              | 0.34               |                              | 0.28            |                              | 0.27               |                              |
|                       | after - early | 0.34            | 0.98 (0.82 - 1.15)           | 0.34               | 0.99 (0.83 - 1.16)           | 0.28            | 1.01 (0.80 - 1.24)           | 0.27               | 1.00 (0.78 - 1.23)           |
|                       | - delayed     | 0.34            | 0.99 (0.89 - 1.12)           | 0.34               | 0.99 (0.88 - 1.11)           | 0.30            | 1.08 (0.90 - 1.29)           | 0.30               | 1.08 (0.89 - 1.29)           |
|                       | - overall     | 0.34            | 0.99 (0.89 - 1.11)           | 0.34               | 0.99 (0.88 - 1.10)           | 0.30            | 1.07 (0.91 - 1.26)           | 0.29               | 1.07 (0.90 - 1.26)           |

primary: primary healthcare, mental: specialized mental healthcare, somatic: specialized somatic healthcare.

<sup>a)</sup> Ratio could not be reliably bootstrapped in our model.

**Supplementary table 5** – Reasons for accessing primary healthcare services, according to ICPC-2, before and after the terrorist attack. Categories with incidence of < 0.2 services per person per year are pooled. Supplement to Figure 4.

|                                        | ICPC-2 | mothers (n=222) |       |         | fathers (n=136) |       |         |
|----------------------------------------|--------|-----------------|-------|---------|-----------------|-------|---------|
|                                        |        | before          | early | delayed | before          | early | delayed |
| Overall                                |        | 5.90            | 11.54 | 7.56    | 4.28            | 7.09  | 5.15    |
| General and unspecified                | (A)    | 0.91            | 0.94  | 1.06    | 0.50            | 0.88  | 0.67    |
| Digestive                              | (D)    | 0.22            | 0.19  | 0.31    | 0.26            | 0.10  | 0.29    |
| Cardiovascular                         | (K)    | 0.29            | 0.29  | 0.51    | 0.55            | 0.76  | 0.65    |
| Musculoskeletal                        | (L)    | 1.36            | 1.21  | 1.60    | 1.10            | 0.84  | 1.07    |
| Psychological                          | (P)    | 0.80            | 6.47  | 1.63    | 0.36            | 2.50  | 0.83    |
| Respiratory                            | (R)    | 0.62            | 0.86  | 0.74    | 0.45            | 0.76  | 0.39    |
| Skin                                   | (S)    | 0.26            | 0.14  | 0.28    | 0.25            | 0.28  | 0.38    |
| Endocrine/Metabolic<br>and Nutritional | (T)    | 0.32            | 0.26  | 0.37    | 0.34            | 0.57  | 0.36    |
| Other                                  |        | 1.13            | 1.19  | 1.05    | 0.47            | 0.38  | 0.51    |

STROBE statement?checklist of items that should be included in reports of observational studies

|                           | Item No | Recommendation                                                                                                                                                                                                                                                                                                                                                                                                    |
|---------------------------|---------|-------------------------------------------------------------------------------------------------------------------------------------------------------------------------------------------------------------------------------------------------------------------------------------------------------------------------------------------------------------------------------------------------------------------|
| <b>Title and abstract</b> |         |                                                                                                                                                                                                                                                                                                                                                                                                                   |
|                           | 1       | (a) Indicate the study's design with a commonly used term in the title or the abstract<br>OK. Page 1.                                                                                                                                                                                                                                                                                                             |
|                           |         | (b) Provide in the abstract an informative and balanced summary of what was done and what was found<br>OK. Page 3.                                                                                                                                                                                                                                                                                                |
| <b>Introduction</b>       |         |                                                                                                                                                                                                                                                                                                                                                                                                                   |
| Background/rationale      | 2       | Explain the scientific background and rationale for the investigation being reported<br>OK. Page 5.                                                                                                                                                                                                                                                                                                               |
| Objectives                | 3       | State specific objectives, including any prespecified hypotheses<br>OK. Page 6.                                                                                                                                                                                                                                                                                                                                   |
| <b>Methods</b>            |         |                                                                                                                                                                                                                                                                                                                                                                                                                   |
| Study design              | 4       | Present key elements of study design early in the paper<br>OK. Page 7.                                                                                                                                                                                                                                                                                                                                            |
| Setting                   | 5       | Describe the setting, locations, and relevant dates, including periods of recruitment, exposure, follow-up, and data collection<br>OK. Page 6-7.                                                                                                                                                                                                                                                                  |
| Participants              | 6       | (a) <i>Cohort study?</i> Give the eligibility criteria, and the sources and methods of selection of participants. Describe methods of follow-up<br><i>Case-control study?</i> Give the eligibility criteria, and the sources and methods of case ascertainment and control selection. Give the rationale for the choice of cases and controls<br><i>Cross sectional study?</i> Give the eligibility criteria, and |

|                           | Item No | Recommendation                                                                                                                                                                                                                  |
|---------------------------|---------|---------------------------------------------------------------------------------------------------------------------------------------------------------------------------------------------------------------------------------|
|                           |         | <p>the sources and methods of selection of participants</p> <p>OK. Page 7.</p>                                                                                                                                                  |
|                           |         | <p>(b) Cohort study? For matched studies, give matching criteria and number of exposed and unexposed</p> <p>Case-control study? For matched studies, give matching criteria and the number of controls per case</p> <p>N/A.</p> |
| Variables                 | 7       | <p>Clearly define all outcomes, exposures, predictors, potential confounders, and effect modifiers. Give diagnostic criteria, if applicable</p> <p>OK. Page 8-9.</p>                                                            |
| Data sources/ measurement | 8*      | <p>For each variable of interest, give sources of data and details of methods of assessment (measurement). Describe comparability of assessment methods if there is more than one group</p> <p>OK. Page 8-9.</p>                |
| Bias                      | 9       | <p>Describe any efforts to address potential sources of bias</p> <p>OK. Page 13.</p>                                                                                                                                            |
| Study size                | 10      | <p>Explain how the study size was arrived at</p> <p>OK. Page 7-8.</p>                                                                                                                                                           |
| Quantitative variables    | 11      | <p>Explain how quantitative variables were handled in the analyses. If applicable, describe which groupings were chosen and why</p> <p>OK. Page 9-10.</p>                                                                       |
| Statistical methods       | 12      | <p>(a) Describe all statistical methods, including those used to control for confounding</p> <p>OK. Page 9-10.</p> <p>(b) Describe any methods used to examine subgroups and</p>                                                |

|                  | Item No | Recommendation                                                                                                                                                                                                                                                                   |
|------------------|---------|----------------------------------------------------------------------------------------------------------------------------------------------------------------------------------------------------------------------------------------------------------------------------------|
|                  |         | interactions<br>N/A                                                                                                                                                                                                                                                              |
|                  |         | (c) Explain how missing data were addressed<br>OK. Page 9-10.                                                                                                                                                                                                                    |
|                  |         | (d) Cohort study?If applicable, explain how loss to follow-up was addressedCase-control study?If applicable, explain how matching of cases and controls was addressedCross sectional study?If applicable, describe analytical methods taking account of sampling strategy<br>N/A |
|                  |         | (e) Describe any sensitivity analyses<br>OK. Page 9-10.                                                                                                                                                                                                                          |
| <b>Results</b>   |         |                                                                                                                                                                                                                                                                                  |
| Participants     | 13*     | (a) Report numbers of individuals at each stage of study?eg numbers potentially eligible, examined for eligibility, confirmed eligible, included in the study, completing follow-up, and analysed<br>OK. Page 7-8.                                                               |
|                  |         | (b) Give reasons for non-participation at each stage<br>OK. Page 7-8.                                                                                                                                                                                                            |
|                  |         | (c) Consider use of a flow diagram<br>Not used.                                                                                                                                                                                                                                  |
| Descriptive data | 14*     | (a) Give characteristics of study participants (eg demographic, clinical, social) and information on exposures and potential confounders<br>OK. Page 7-8                                                                                                                         |
|                  |         | (b) Indicate number of                                                                                                                                                                                                                                                           |

|                   | Item No | Recommendation                                                                                                                                                                                                                          |
|-------------------|---------|-----------------------------------------------------------------------------------------------------------------------------------------------------------------------------------------------------------------------------------------|
|                   |         | <p>participants with missing data for each variable of interest</p> <p>OK. Page 7-8</p>                                                                                                                                                 |
|                   |         | (c) <i>Cohort study</i> ? Summarise follow-up time (eg average and total amount)                                                                                                                                                        |
| Outcome data      | 15*     | <p><i>Cohort study</i>? Report numbers of outcome events or summary measures over time</p> <p>OK. Page 10-11</p>                                                                                                                        |
|                   |         | <i>Case-control study</i> ? Report numbers in each exposure category, or summary measures of exposure                                                                                                                                   |
|                   |         | <i>Cross sectional study</i> ? Report numbers of outcome events or summary measures                                                                                                                                                     |
| Main results      | 16      | <p>(a) Report the numbers of individuals at each stage of the study? eg numbers potentially eligible, examined for eligibility, confirmed eligible, included in the study, completing follow-up, and analysed</p> <p>OK. Page 10-11</p> |
|                   |         | (b) Give reasons for non-participation at each stage                                                                                                                                                                                    |
|                   |         | (c) Consider use of a flow diagram                                                                                                                                                                                                      |
| Other analyses    | 17      | <p>Report other analyses done? eg analyses of subgroups and interactions, and sensitivity analyses</p> <p>OK. Page 11</p>                                                                                                               |
| <b>Discussion</b> |         |                                                                                                                                                                                                                                         |
| Key results       | 18      | <p>Summarise key results with reference to study objectives</p> <p>OK. Page 12-13</p>                                                                                                                                                   |
| Limitations       | 19      | <p>Discuss limitations of the study, taking into account sources of potential bias or imprecision. Discuss both direction and magnitude of any potential bias</p>                                                                       |

|                          | Item No | Recommendation                                                                                                                                                                               |
|--------------------------|---------|----------------------------------------------------------------------------------------------------------------------------------------------------------------------------------------------|
|                          |         | OK. Page 13                                                                                                                                                                                  |
| Interpretation           | 20      | Give a cautious overall interpretation of results considering objectives, limitations, multiplicity of analyses, results from similar studies, and other relevant evidence<br>OK. Page 12-13 |
| Generalisability         | 21      | Discuss the generalisability (external validity) of the study results<br>OK. Page 13                                                                                                         |
| <b>Other information</b> |         |                                                                                                                                                                                              |
| Funding                  | 22      | Give the source of funding and the role of the funders for the present study and, if applicable, for the original study on which the present article is based<br>OK. Page 15                 |
