# Supplementary material for: Healthcare to parents of young terrorism survivors: a registry-based study in Norway
Source: PubMed Central journal article supplement — BMJ Open. 2017 Dec 21;7(12):e018358. doi: 10.1136/bmjopen-2017-018358 (PMC5778306; doi:10.1136/bmjopen-2017-018358), 2017-12-21
Supplement: bmjopen-2017-018358supp001.pdf [file bmjopen-2017-018358supp001.pdf]

**Supplementary table 1** – Nature of the different healthcare services provided to the study participants in the three year periods before and after the Utøya attack (total number of services: 19,208).

|                                         | Primary healthcare  |                    | Specialized mental healthcare |                    | Specialized somatic healthcare |                    |
|-----------------------------------------|---------------------|--------------------|-------------------------------|--------------------|--------------------------------|--------------------|
|                                         | before<br>(n=5,675) | after<br>(n=7,702) | before<br>(n=578)             | after<br>(n=1,501) | before<br>(n=1,836)            | after<br>(n=1,916) |
| outpatient, consultations               | 3130 (55.2)         | 4082 (53.0)        | 531 (91.9)                    | 1374 (91.5)        | 1631 (88.8)                    | 1694 (88.4)        |
| outpatient, other services <sup>a</sup> | 2545 (44.8)         | 3620 (47.0)        | 31 (5.4)                      | 112 (7.5)          | 67 (3.6)                       | 97 (5.1)           |
| inpatient, admissions <sup>b</sup>      | -                   | -                  | 16 (2.8)                      | 15 (1.0)           | 138 (7.5)                      | 125 (6.5)          |

<sup>a</sup> telephone consultations, mail correspondence etc.

<sup>b</sup> mean duration of admissions, pre- and post-disaster - specialized mental healthcare – 10.7 days (SD 9.2) and 15.1 days (SD 17.2) - specialized somatic healthcare - 5.4 days (SD 7.6) and 4.60 days (SD 6.9).

**Supplementary table 2** – Incomplete entries (missing patient ID) in the Norwegian Patient Registry<sup>1</sup>

a) Specialized mental healthcare services

| year | missing ID (%) |
|------|----------------|
| 2008 | 5.80 %         |
| 2009 | 4.79 %         |
| 2010 | 0.78 %         |
| 2011 | 0.49 %         |
| 2012 | 0.53 %         |
| 2013 | 0.30 %         |
| 2014 | 0.25 %         |

b) Specialized somatic healthcare services

| year | missing ID (%) |
|------|----------------|
| 2008 | 4.89 %         |
| 2009 | 3.31 %         |
| 2010 | 2.19 %         |
| 2011 | 2.18 %         |
| 2012 | 1.66 %         |
| 2013 | 1.32 %         |
| 2014 | 1.22 %         |

<sup>1</sup> Source: the Norwegian Patient Registry.

**Supplementary table 3** – Observed rates of healthcare service consumption in the three-year periods before and after the terrorist attack, annualized values. Supplement to Figure 2.

|                                                    | mothers (n=222) |             |             | Fathers (n=136) |             |             |
|----------------------------------------------------|-----------------|-------------|-------------|-----------------|-------------|-------------|
|                                                    | primary         | mental      | somatic     | primary         | mental      | somatic     |
| <b>Before</b> (all services   consultations only)  |                 |             |             |                 |             |             |
| 2008-Jul-22 to 2009-Jan-21                         | 5.41   3.33     | 0.34   0.34 | 2.12   2.05 | 3.79   2.24     | 0.24   0.22 | 1.21   1.16 |
| 2009-Jan-22 to 2009-Jul-21                         | 5.98   3.05     | 0.41   0.39 | 1.49   1.46 | 3.57   1.93     | 0.19   0.19 | 0.87   0.72 |
| 2009-Jul-22 to 2010-Jan-21                         | 5.60   3.13     | 0.49   0.48 | 1.19   1.17 | 4.25   2.35     | 0.46   0.34 | 1.72   1.69 |
| 2010-Jan-22 to 2010-Jul-21                         | 6.08   3.14     | 0.47   0.44 | 1.76   1.64 | 4.10   2.46     | 0.87   0.87 | 2.00   1.97 |
| 2010-Jul-22 to 2011-Jan-21                         | 6.19   3.35     | 0.47   0.43 | 1.46   1.38 | 4.97   2.91     | 1.06   1.04 | 1.72   1.66 |
| 2011-Jan-22 to 2011-Jul-21                         | 6.13   3.17     | 0.72   0.64 | 1.49   1.40 | 5.00   2.85     | 0.74   0.71 | 1.96   1.94 |
| <b>After</b> (all services   consultations only)   |                 |             |             |                 |             |             |
| <i>early aftermath</i>                             |                 |             |             |                 |             |             |
| 2011-Jul-22 to 2011-Aug-21                         | 18.65   7.62    | 1.57   1.35 | 0.97   0.97 | 9.26   4.59     | 1.06   0.97 | 0.97   0.97 |
| 2011-Aug-22 to 2011-Sep-21                         | 14.65   7.57    | 3.46   3.03 | 1.89   1.84 | 7.15   3.88     | 0.79   0.79 | 1.59   1.50 |
| 2011-Sep-22 to 2011-Oct-21                         | 9.62   4.92     | 3.35   3.19 | 1.68   1.62 | 5.91   3.09     | 0.62   0.62 | 1.85   1.85 |
| 2011-Oct-22 to 2011-Nov-21                         | 9.57   5.19     | 3.51   3.30 | 1.41   1.41 | 7.15   3.88     | 0.44   0.44 | 2.74   2.74 |
| 2011-Nov-22 to 2011-Dec-21                         | 9.51   5.03     | 4.00   3.78 | 1.62   1.62 | 6.62   3.26     | 0.62   0.62 | 1.68   1.68 |
| 2011-Dec-22 to 2012-Jan-21                         | 7.24   3.68     | 3.30   2.97 | 1.03   0.86 | 6.44   3.79     | 0.62   0.62 | 2.03   1.85 |
| <i>delayed aftermath</i>                           |                 |             |             |                 |             |             |
| 2012-Jan-22 to 2012-Jul-21                         | 7.89   3.86     | 2.17   1.95 | 1.35   1.32 | 5.21   3.00     | 0.68   0.63 | 1.38   1.29 |
| 2012-Jul-22 to 2013-Jan-21                         | 7.67   4.25     | 1.53   1.43 | 2.09   2.01 | 5.32   3.31     | 0.68   0.63 | 1.26   1.22 |
| 2013-Jan-22 to 2013-Jul-21                         | 7.05   3.64     | 1.76   1.68 | 1.82   1.71 | 4.78   2.72     | 0.63   0.53 | 1.62   1.51 |
| 2013-Jul-22 to 2014-Jan-21                         | 7.52   4.10     | 1.32   1.24 | 1.95   1.86 | 5.26   3.04     | 0.69   0.59 | 1.50   1.38 |
| 2014-Jan-22 to 2014-Jul-21                         | 7.60   3.80     | 0.88   0.83 | 1.6   1.43  | 5.16   2.87     | 0.76   0.71 | 2.04   1.87 |
| <b>Summary</b> (all services   consultations only) |                 |             |             |                 |             |             |
| Average before                                     | 5.90   3.20     | 0.48   0.45 | 1.58   1.52 | 4.28   2.46     | 0.59   0.56 | 1.58   1.52 |
| Average after                                      | 8.21   4.22     | 1.81   1.68 | 1.71   1.62 | 5.47   3.12     | 0.69   0.63 | 1.60   1.51 |

primary: primary healthcare, mental: specialized mental healthcare, somatic: specialized somatic healthcare

**Supplementary table 4** – Rate ratios of parents’ post- versus pre-disaster healthcare consumption, in terms of (a) predictions of frequency of healthcare service consumption (age-adjusted negative binomial hurdle regression) and (b) proportions of individuals provided for (mean semiannual values). Confidence intervals (95%) of the rate ratios were generated through bootstrap replications. Supplement to Figure 3.

|  | mothers (n=222) |                              |                    |                              | fathers (n=136) |                              |                    |                              |
|--|-----------------|------------------------------|--------------------|------------------------------|-----------------|------------------------------|--------------------|------------------------------|
|  | all services    |                              | consultations only |                              | all services    |                              | consultations only |                              |
|  | estimate        | ratio, after/before (95% CI) | estimate           | ratio, after/before (95% CI) | estimate        | ratio, after/before (95% CI) | estimate           | ratio, after/before (95% CI) |

**a) services**

|         |               |       |                     |      |                     |      |                    |      |                    |
|---------|---------------|-------|---------------------|------|---------------------|------|--------------------|------|--------------------|
| primary | <i>before</i> | 5.92  |                     | 3.21 |                     | 0.71 |                    | 0.66 |                    |
|         | after - early | 11.65 | 1.97 (1.76 - 2.23)  | 5.71 | 1.78 (1.57 - 2.02)  | 0.54 | 1.73 (1.36 - 2.29) | 0.52 | 1.57 (1.28 - 1.91) |
|         | - delayed     | 7.57  | 1.28 (1.15 - 1.42)  | 3.97 | 1.24 (1.11 - 1.43)  | 0.76 | 1.20 (0.99 - 1.45) | 0.68 | 1.26 (1.05 - 1.52) |
|         | - overall     | 8.26  | 1.40 (1.27 - 1.54)  | 4.26 | 1.33 (1.20 - 1.50)  | 0.73 | 1.29 (1.07 - 1.55) | 0.66 | 1.31 (1.10 - 1.55) |
| mental  | <i>before</i> | 0.46  |                     | 0.43 |                     | 0.71 |                    | 0.66 |                    |
|         | after - early | 3.25  | 7.00 (3.86 - 19.02) | 2.98 | 6.88 (3.84 - 18.95) | 0.54 | 0.77 <sup>a</sup>  | 0.52 | 0.78 <sup>a</sup>  |
|         | - delayed     | 1.48  | 3.20 (1.49 - 9.49)  | 1.38 | 3.19 (1.45 - 9.60)  | 0.76 | 1.07 <sup>a</sup>  | 0.68 | 1.03 <sup>a</sup>  |
|         | - overall     | 1.78  | 3.84 (1.95 - 11.21) | 1.65 | 3.82 (1.94 - 11.18) | 0.73 | 1.03 <sup>a</sup>  | 0.66 | 1.00 <sup>a</sup>  |
| somatic | <i>before</i> | 1.58  |                     | 1.52 |                     | 1.31 |                    | 1.26 |                    |
|         | after - early | 1.48  | 0.93 (0.74 - 1.20)  | 1.43 | 0.94 (0.75 - 1.21)  | 1.64 | 1.25 (0.77 - 2.18) | 1.59 | 1.26 (0.75 - 2.19) |
|         | - delayed     | 1.77  | 1.12 (0.86 - 1.44)  | 1.67 | 1.10 (0.84 - 1.44)  | 1.36 | 1.04 (0.75 - 1.51) | 1.30 | 1.03 (0.73 - 1.48) |
|         | - overall     | 1.72  | 1.09 (0.85 - 1.37)  | 1.63 | 1.08 (0.84 - 1.37)  | 1.41 | 1.07 (0.79 - 1.52) | 1.35 | 1.07 (0.78 - 1.52) |

**b) individuals**

|         |               |      |                     |      |                     |      |                    |      |                    |
|---------|---------------|------|---------------------|------|---------------------|------|--------------------|------|--------------------|
| primary | <i>before</i> | 0.74 |                     | 0.63 |                     | 0.56 |                    | 0.49 |                    |
|         | after - early | 0.88 | 1.19 (1.13 - 1.25)  | 0.79 | 1.26 (1.17 - 1.34)  | 0.74 | 1.31 (1.16 - 1.48) | 0.66 | 1.36 (1.18 - 1.57) |
|         | - delayed     | 0.79 | 1.07 (1.03 - 1.11)  | 0.69 | 1.10 (1.04 - 1.16)  | 0.62 | 1.11 (1.02 - 1.21) | 0.53 | 1.10 (0.99 - 1.21) |
|         | - overall     | 0.80 | 1.09 (1.05 - 1.13)  | 0.70 | 1.12 (1.07 - 1.18)  | 0.64 | 1.14 (1.05 - 1.24) | 0.55 | 1.14 (1.04 - 1.26) |
| mental  | <i>before</i> | 0.03 |                     | 0.03 |                     | 0.03 |                    | 0.03 |                    |
|         | after - early | 0.22 | 6.68 (3.86 - 12.00) | 0.22 | 6.55 (3.78 - 11.65) | 0.08 | 3.14 (1.33 - 6.86) | 0.08 | 3.14 (1.35 - 6.86) |
|         | - delayed     | 0.12 | 3.49 (2.00 - 6.38)  | 0.11 | 3.33 (1.90 - 6.12)  | 0.05 | 1.89 (0.84 - 3.96) | 0.05 | 1.77 (0.73 - 3.60) |
|         | - overall     | 0.13 | 4.02 (2.34 - 7.22)  | 0.13 | 3.86 (2.25 - 6.92)  | 0.05 | 2.10 (0.95 - 4.18) | 0.05 | 2.00 (0.86 - 3.75) |
| somatic | <i>before</i> | 0.35 |                     | 0.34 |                     | 0.28 |                    | 0.27 |                    |
|         | after - early | 0.34 | 0.98 (0.82 - 1.15)  | 0.34 | 0.99 (0.83 - 1.16)  | 0.28 | 1.01 (0.80 - 1.24) | 0.27 | 1.00 (0.78 - 1.23) |
|         | - delayed     | 0.34 | 0.99 (0.89 - 1.12)  | 0.34 | 0.99 (0.88 - 1.11)  | 0.30 | 1.08 (0.90 - 1.29) | 0.30 | 1.08 (0.89 - 1.29) |
|         | - overall     | 0.34 | 0.99 (0.89 - 1.11)  | 0.34 | 0.99 (0.88 - 1.10)  | 0.30 | 1.07 (0.91 - 1.26) | 0.29 | 1.07 (0.90 - 1.26) |

primary: primary healthcare, mental: specialized mental healthcare, somatic: specialized somatic healthcare.

<sup>a)</sup> Ratio could not be reliably bootstrapped in our model.

**Supplementary table 5** – Reasons for accessing primary healthcare services, according to ICPC-2, before and after the terrorist attack. Categories with incidence of < 0.2 services per person per year are pooled. Supplement to Figure 4.

|                                        | ICPC-2 | mothers (n=222) |       |         | fathers (n=136) |       |         |
|----------------------------------------|--------|-----------------|-------|---------|-----------------|-------|---------|
|                                        |        | before          | early | delayed | before          | early | delayed |
| Overall                                |        | 5.90            | 11.54 | 7.56    | 4.28            | 7.09  | 5.15    |
| General and unspecified                | (A)    | 0.91            | 0.94  | 1.06    | 0.50            | 0.88  | 0.67    |
| Digestive                              | (D)    | 0.22            | 0.19  | 0.31    | 0.26            | 0.10  | 0.29    |
| Cardiovascular                         | (K)    | 0.29            | 0.29  | 0.51    | 0.55            | 0.76  | 0.65    |
| Musculoskeletal                        | (L)    | 1.36            | 1.21  | 1.60    | 1.10            | 0.84  | 1.07    |
| Psychological                          | (P)    | 0.80            | 6.47  | 1.63    | 0.36            | 2.50  | 0.83    |
| Respiratory                            | (R)    | 0.62            | 0.86  | 0.74    | 0.45            | 0.76  | 0.39    |
| Skin                                   | (S)    | 0.26            | 0.14  | 0.28    | 0.25            | 0.28  | 0.38    |
| Endocrine/Metabolic<br>and Nutritional | (T)    | 0.32            | 0.26  | 0.37    | 0.34            | 0.57  | 0.36    |
| Other                                  |        | 1.13            | 1.19  | 1.05    | 0.47            | 0.38  | 0.51    |
